# Signatures of divergent antimalarial treatment responses in peripheral blood from infants and adults in Malawi

Paul L. Maurizio<sup>1,2,3\*</sup>, Hubaida Fuseini<sup>4</sup>, Gerald Tegha<sup>5</sup>, Mina Hosseinipour<sup>6</sup> and Kristina De Paris<sup>7</sup>

<sup>1</sup> Present Address: Department of Medicine, The University of Chicago, 60637 Chicago, Illinois, USA.;

\* Correspondence: [maurizio@uchicago.edu](mailto:maurizio@uchicago.edu); Full list of author information is available at the end of the article.

## Abstract

**Background:** Heterogeneity in the immune response to parasite infection is mediated in part by differences in host genetics, sex, and age group. In neonates and infants, ongoing immunological maturation often results in increased susceptibility to infection and variable responses to drug treatment, increasing the risk of complications. Even though significant age-specific effects on host cytokine responses to *Plasmodium falciparum* infection have been identified, age effects on uncomplicated malaria infection and antimalarial treatment remain poorly understood.

**Methods:** In samples of whole blood from a cohort of naturally infected malaria-positive individuals in Malawi (n=63 total; 34 infants <2 years old, 29 adults >18 years old), we assessed blood cytokine levels and characterized monocyte and dendritic cell frequencies at two timepoints: acute infection, and four weeks post antimalarial treatment. We modeled the effects of age group, sex, and timepoint, and evaluated the role of these factors on infection and treatment outcomes.

**Results:** Regardless of treatment timepoint, in our population age was significantly associated with overall blood hemoglobin, which was higher in adults, and plasma nitric oxide, IL-10, and TNF- $\alpha$  levels, which were higher in infants. We found a significant effect of age on the hemoglobin treatment response, whereby after treatment, levels increased in infants and decreased in adults. Furthermore, we observed significant age-specific effects on treatment response for overall parasite load, IFN- $\gamma$ , and IL-12(p40), and these effects were sex-dependent. We uncovered significant age effects on the overall levels and treatment response of myeloid dendritic cell frequencies. In addition, within each age group, we found continuous age effects on gametocyte levels (*Pfs16*), TNF- $\alpha$ , and nitric oxide.

**Conclusions:** In a clinical study of infants and adults experiencing natural malaria infection and receiving antimalarial treatment, we identified age-specific signatures of infection and treatment responses in peripheral blood. We describe host markers that may indicate, and potentially mediate, differential post-treatment outcomes for malaria in infants versus adults.

**Keywords:** *Plasmodium falciparum*; uncomplicated malaria; heterogeneity; cytokines; pediatric

## 1 Background

2 Variation in the host response to parasite infection depends on a variety of factors including age, sex, host  
3 genetics, pathogen strain, and environment. Infant-associated increases in malaria severity are determined in  
4 part by the particularities of the infant immune milieu, making this an important and active area of research [1].  
5 However, in addition to age-dependent effects on infection, effects on the response to anti-parasite chemotherapy  
6 are not well understood, even though these effects may impede the global agenda for malaria elimination  
7 and eradication [2]. Therefore, our lack of knowledge about age-related differences in immune responses to  
8 *Plasmodium falciparum* infection and treatment constrains our ability to develop protective antimalarial vaccines  
9 and therapeutics for younger individuals who may be at increased risk for severe complications [3, 4, 5].

10 In malaria endemic regions, repeated exposure to parasites may generate adaptive immunity in some infant  
11 populations as a mechanism for protection from severe disease, after the protection offered by maternal anti-  
12 bodies has waned [6, 7, 8, 9, 10, 11]. However, age-dependent changes in immune function may also contribute  
13 to improved immune responses in adults. Thus, recent studies have explored age-dependent effects in order to  
14 understand the relative contribution of parasitological and host immunological effects on heterogeneity in the  
15 response to malaria infection.

16 Age-dependent effects on the production of anti-*Plasmodium* antibodies against pre-erythrocytic and asexual  
17 blood stage antigens were recently reported by Ouédraogo *et al.* [12]. In addition, in children from Mozambique,  
18 significant associations were found between infant age and levels of IgG directed against merozoite-stage *Plas-*  
19 *modium* [13]. Furthermore, age-dependent effects on B cell response magnitude [14] and post-treatment parasite  
20 clearance [15] have also been described. Whereas these studies focused on identifying age-dependent differences  
21 in adaptive and antibody-related responses to parasite infection, our study focuses on age-specific differences in  
22 plasma cytokine levels and monocyte activation—factors that may be critical for determining treatment efficacy  
23 in infant populations.

24 Infants face multiple barriers to overcoming malaria infection, including suboptimal innate immune responses  
25 to natural infection and poor antimalarial treatment efficacy, which in some cases results in serious outcomes,  
26 such as severe malarial anemia (SMA) or cerebral malaria (CM). Studies have shown that SMA and CM  
27 are driven by proinflammatory cytokine secretion and immunopathology, suggesting immunomodulation as a  
28 potential avenue for adjunctive therapy to prevent severe outcomes in infants [16, 17, 18, 19]. Although SMA  
29 and CM have been a major focus of research in infants, we were interested in identifying age-specific markers of  
30 treatment response in *uncomplicated* malaria (UM)—an area that is arguably less well studied and yet remains  
31 critical to understanding phenotypic variation in the majority of malaria-infected and treated infants. Therefore,

32 in order to isolate age-specific effects on UM, and also to avoid exacerbation of disease among participants, we  
33 excluded individuals who showed evidence of severe anemia from our cohort.

34 In this study, we examined infant and adult peripheral blood, collected during acute malaria infection and  
35 ~4 weeks post-antimalarial treatment, to identify signatures of differential host responses to infection and  
36 treatment. Among our main findings, we report significantly higher plasma IL-10 and TNF- $\alpha$  levels, and nitric  
37 oxide, in infants compared with adults, regardless of treatment. We also observed that IFN- $\gamma$  and IL-12(p40)  
38 treatment responses differed significantly based on age, in a sex-specific manner. In addition, we observed several  
39 subjects (5 of 63) with apparent treatment failure, or reinfection. Thus, this work improves our understanding of  
40 the infant-specific response to malaria infection, implicating inflammatory differences in whole blood treatment  
41 responses on post-treatment infection resolution, and may contribute to the development of improved vaccines  
42 and therapies for pediatric populations.

## 43 **Methods**

### 44 **Study population and sample collection**

45 We randomly selected subjects for this study from patients who tested positive for *Plasmodium falciparum*  
46 infection, February 1st, 2012 through May 22nd, 2012, at the Kamuzu Central Hospital (KCH) outpatient  
47 clinic in Malawi. A total of 34 infants (4-24 months) and 29 adults (19-70 years) were enrolled (**Table 1**). We  
48 obtained informed written consent from adult participants and from parents of infant participants during the  
49 first clinic visit. Enrollment in the study was voluntary and all infected patients received antimalarial treatment  
50 independent of enrollment. The study was approved by the Institutional Review Board at UNC and the National  
51 Health Sciences Research Committee, under the oversight of the Ministry of Health, in Malawi. The institutional  
52 guidelines strictly adhere to the World Medical Association's Declaration of Helsinki.

53 Individuals who visited the hospital and whose clinical diagnosis was consistent with malaria were subsequently  
54 screened by a rapid diagnostic test (RDT) to determine malaria positivity, and then enrolled in the study (n=63).  
55 Study participants were asked to donate a venous blood sample (infants: 3-5 mL; adults: 10 mL) at their first  
56 visit (V1; "acute pre-treatment"). Malaria infection was confirmed by microscopic examination of blood smears.  
57 Infants with severe malaria (hemoglobin < 8.0 g/dL and hematocrit < 18%) were excluded from the study  
58 to avoid the risk of exacerbating SMA. In addition, whole blood from participants was blotted and dried on  
59 Whatman 903<sup>TM</sup> protein saver cards (#10534612) for gametocytemia analysis.

60 Infected participants were prescribed antimalarial chemotherapy, which consisted of a first-line regimen of  
61 artemether-lumefantrine (AL), and were asked to return in 4-6 weeks for a second visit (V2; "post-treatment")  
62 and blood sample collection. Subjects' samples and clinical details were de-identified in Malawi. Age, sex, and  
63 parasitemia of each patient were recorded with a corresponding unique patient ID code. Blood plasma was

64 collected and stored at -80°C. Peripheral blood mononuclear cells (PBMCs) were isolated using Ficoll-Paque  
65 gradient separation and then frozen in 10% DMSO / 90% fetal bovine serum (FBS) and stored in liquid nitrogen.  
66 De-identified samples, including blood plasma, PBMCs and dried blood spots, were shipped to the University  
67 of North Carolina at Chapel Hill for additional analysis. Details about the selection and phenotyping of study  
68 participants are summarized in (**Figure 1**).

#### 69 Parasite load

70 To determine the level of infection in all malaria-positive subjects, parasitemia was quantified at the Kamuzu  
71 Central Hospital clinic in Malawi by light microscopy of thick blood smears at V1 and V2. All slides were read  
72 by two expert readers independently and mean values are used as phenotypes; in cases with data discordance,  
73 a third reader was assigned.

#### 74 Stage-specific gametocytemia

75 To detect mature parasite infection based on estimated gametocyte load, we used quantitative real-time PCR  
76 (qRT-PCR). Total DNA and total RNA were isolated from subjects' dried blood spots at V1 using nucleic acid  
77 purification kits (Norgen Biotek #35300, #36000), and cDNAs were used in qRT-PCR assays [20, 21]. These  
78 cDNAs were used to measure RNA expression levels of *P. falciparum* gametocyte-specific genes, including *Pfs25*  
79 (mature gametocyte), *Pfs16* (early gametocyte) [22], and *Pfs230*, which encodes a gametocyte antigen important  
80 for eliciting host antibodies that inhibit parasite transmission to a mosquito host [23, 24].

#### 81 Antimalarial antibodies

82 We assessed antimalarial antibodies using a semi-quantitative human malaria antibody ELISA kit (IBL Inter-  
83 national Inc., Hamburg, Germany #RE58901), according to manufacturer's protocol. From these results, the  
84 fraction of infant and adult participants who tested positive for malaria-specific antibodies (IgM or IgG) were  
85 calculated.

#### 86 Hemoglobin

87 Hemoglobin levels were measured in clinic, at V1 and V2, and are reported in g/dL.

#### 88 Nitric oxide

89 Plasma samples were deproteinated and NO levels were quantified for V1 and V2 using the QuantiChrom™  
90 nitric oxide assay kit (BioAssay Systems #D2NO-100). Quantification using OD was carried out according  
91 to the manufacturer's protocol (PerkinElmer). Concentrations were based on absorbances normalized to the  
92 manufacturer's standard and calculated via the Beer-Lambert law.

### 93 Plasma cytokines

94 The following analytes were measured in the plasma, for V1 and V2, using the MILLIPLEX MAP Human  
95 Cytokine/Chemokine Magnetic Bead Panel/Immunology Multiplex Assay (EMD Millipore #HCYTOMAG-  
96 60K): GM-CSF, IFN- $\gamma$ , IL-10, IL-12(p40), IL-12(p70), sCD40L, IL-1 $\beta$ , IL-6, and TNF- $\alpha$ . Assays were performed  
97 according to the manufacturer protocols on a MagPix (Luminex) instrument at the UNC-Chapel Hill Center for  
98 AIDS Research (CFAR) HIV/STD Laboratory Core. Standard curves were fit and experimental concentrations  
99 determined from a 5-parameter weighted logistic model using the xPONENT<sup>®</sup> software (v4.1.308.0).

### 100 Monocyte and dendritic cell composition

101 Flow-cytometric analysis was performed to characterize myeloid dendritic cell (mDC) and monocyte (Mo)  
102 frequencies in PBMCs. All antibodies were purchased from BD Biosciences (San Jose, CA). Cells were stained  
103 according to BD protocols using the following mouse anti-human antibodies: CD3 (clone SP34-2), CD14 (clone  
104 M5E2), CD16 (clone 3G8), CD20 (clone 2H7), CD33 (clone P67.6), HLA-DR (clone G46.6), and CD11c (clone  
105 S-HCL-3). MDC frequencies were reported as percentage of mononuclear cells (MNC). Monocytes were further  
106 defined by gating as traditional monocytes (CD14<sup>++</sup>CD16<sup>-</sup>), inflammatory monocytes (CD14<sup>++</sup>CD16<sup>+</sup>) and  
107 patrolling monocytes (CD14<sup>dim</sup> CD16<sup>++</sup>) (see **Supplemental Figure S1**). Samples were acquired on the  
108 LSR11 (BD; San Jose, CA) using FACS DIVA software and analyzed with FlowJo (TreeStar, Inc., Ashland,  
109 OR).

### 110 Statistical methods

111 We analyzed our data in the statistical programming language R [25]. Responses were measured for each study  
112 participant, using peripheral blood samples collected at two time points: immediately after malaria diagnosis,  
113 at visit 1 (V1); and approximately four weeks after completing antimalarial treatment, at visit 2 (V2). Some  
114 phenotypes were only measured at V1, and some were measured at both V1 and V2.

115 We used a zero-inflated Poisson (ZIP) regression model [26] (log link) to evaluate the effect of age and visit  
116 on microscopy-based parasite counts at V1 and V2. In brief, ZIP regression uses a two-component mixture  
117 model that simultaneously accounts for zero-and non-zero counts using a Poisson, as well as accounting for zero  
118 inflation using the binomial distribution (probit link), which is fit using maximum likelihood estimation via the  
119 R package `pscl` [27, 28].

120 To model effects of age on gametocytemia, as measured from dried blood spots collected during V1 only, we  
121 used the exact Wilcoxon-Mann-Whitney two-sample rank-sum test via the R package `coin` [29], stratifying by  
122 sex. We report a two-sided *p*-value.

123 To model effects of age and sex on antimalarial antibody results (“negative”, “grey”, or “positive”) at V1 and  
124 V2, we used ordered logistic regression (a cumulative link model [30]), via the R package `MASS` [31].

125 For all additional blood analyte phenotypes that were measured at both V1 and V2, we modeled our data  
126 using a rank-based nonparametric model that accommodates longitudinal data which is collected in a factorial  
127 design [32, 33]. The model is implemented in the R package `nparLD` [34]; ranks were contrasted between groups  
128 and used to calculate ANOVA-type statistics [35] according to the factors of interest, which were in our case: age  
129 group (infant, adult), sex (male, female), visit (V1, V2), and their pairwise and three-way interactions. Among  
130 our subjects, there were missing data points in at least one phenotype: for one individual on the first visit (V1),  
131 and for six individuals on the second visit (V2).

## 132 Results

### 133 Subjects

134 Our study population was comprised of 63 enrolled subjects, including 34 infants < 2 years old ( $n_{\text{females}}=16$ ,  
135  $n_{\text{males}}=18$ , and 29 adults  $\geq 18$  years old ( $n_{\text{females}}=16$ ,  $n_{\text{males}}=13$ ). All enrolled subjects tested positive for  
136 malaria by RDT. Characteristics of the infant and adult participants are provided in **Table 1**.

### 137 Parasite load

138 To determine the effect of antimalarial treatment on parasite burden in infected adults and infants, and to test  
139 for the effect of age and sex, we quantified parasite loads at V1 and V2 using microscopy of patients' thick blood  
140 smears. During acute infection (V1), parasite loads were detected in 21 of the 27 adults measured (77.8%) and  
141 25 of the 33 infants measured (75.8%), indicating increased sensitivity of RDT-based diagnosis vs. microscopy.  
142 Among infants and adults with detectable parasite loads at V1, parasite counts were significantly higher on  
143 average ( $p < 10^{-16}$ ), by more than 6-fold, in infants ( $9.35 \times 10^4 \text{ } \mu\text{l}^{-1}$ ) compared with adults ( $1.40 \times 10^4$   
144  $\mu\text{l}^{-1}$ ); in addition, we found a significant overall effect of age, and a significant age-by-sex interaction (both  
145  $p < 2 \times 10^{-16}$ ). We found a significant overall zero-inflation intercept ( $p = 0.0225$ ), indicating the detection of  
146 excess zero (undetectable) counts in our data set, and these were unaffected by age or sex.

147 After antimalarial treatment (V2), parasite counts decreased to undetectable in all but 5 female subjects who  
148 had residual detectable parasitemia (1 adult, 4 infants). For 4 of these 5, parasite loads nevertheless decreased  
149 substantially from V1 to V2 (**Figure 2A**)

### 150 Stage-specific gametocytemia

151 In the human host, *Plasmodium falciparum* traverses through several life stages. During bloodfeeding at the  
152 dermis of a naive host, an infected female *Anopheles* mosquito transmits parasites to the host bloodstream as  
153 sporozoites. They mature into schizonts in the liver, rupture from liver cells as merozoites, and grow as ring-  
154 stage trophozoites which then enter a schizont-merozoite-trophozoite cycle [36, 37]. A proportion of blood-stage  
155 parasites develop into gametocytes, which are the haploid, sexual stage parasites that can subsequently be

156 transmitted to a new female mosquito during bloodfeeding. Whereas it is blood stage parasites that primarily  
157 drive clinical disease, gametocytes are important for human-to-mosquito transmission.

158 In order to determine the effect of age on stage-specific gametocyte levels in patients' blood at V1, we estimated  
159 *P. falciparum* gametocyte levels in subjects' blood using qRT-PCR. We used gametocyte stage-specific primers  
160 to quantify gene expression of *Pfs16*, *Pfs25* and *Pfs230* from cDNAs prepared from dried blood spots taken  
161 during V1. These quantities are not significantly correlated ( $p > 0.08$ ), indicating that they are likely marking  
162 different gametocyte populations in our data set. Whereas, using the *Pfs16* (**Figure 2B**) and *Pfs230* (**Figure**  
163 **2C**) primers, the estimated number of gametocytes did not differ significantly between age groups, we found that  
164 infants had significantly higher levels of *Pfs25*-expressing gametocytes (median 0.465 gametocytes/ $\mu$ l) compared  
165 with adults (0.255/ $\mu$ l) ( $p = 0.00685$ ) (**Figure 2D**). We observed no sex-based differences in gene expression for  
166 *Pfs16*, *Pfs25* or *Pfs230*.

#### 167 Hemoglobin

168 *Plasmodium* parasites infect erythrocytes, which are a source of hemoglobin (Hb), a host product that is toxic  
169 to the parasites. Thus, to survive, *Plasmodium* converts Hb into hemozoin, a chemical more favorable to the  
170 parasite. Effects of parasites on Hb levels in the blood may indicate differences in the physiology and composition  
171 of host erythrocytes. In order to determine the effect of sex, age, and antimalarial treatment on Hb in study  
172 participants, we measured Hb at V1 and V2. We found a significant overall effect of age on Hb levels (higher  
173 in adults,  $p = 3.86 \times 10^{-15}$ ), a significant main effect of sex (higher in females,  $p = 5.6 \times 10^{-3}$ ), as well as a  
174 significant age:visit interaction effect ( $p = 3.14 \times 10^{-4}$ ) (**Figure 3**). Compared with the treatment response in  
175 adults, whose Hb levels were lower on V2 compared with V1, Hb levels in infants were higher on V2 compared  
176 with V1.

#### 177 Antimalarial antibody response

178 During V1, half of all infants in our study (17 of 34 total; or 10 of 18 males and 7 of 16 females) had detectable  
179 antimalarial antibodies, indicating prior exposure to malaria parasites or acquisition of maternal antimalarial  
180 antibodies. This is in contrast with the 22 of 29 adults (75.9%; or 10 of 13 males and 12 of 16 females) who  
181 had detectable antimalarial antibody at V1, suggesting increased parasite exposure or increased capacity for  
182 antibody production, resulting in increased antibody detectability, in adults compared with infants. Thus, we  
183 found a significant overall effect of age in our samples ( $p=0.0298$ ), but no significant effects of sex or treatment.  
184 We found that the detectability of antimalarial antibodies was reduced to undetectable levels in five individuals  
185 between V1 and V2. Among these five individuals, two were adults (1 male, 1 female) and three were infants (2  
186 males, 1 female). Only two subjects, both infants (1 male, 1 female), transitioned from no detectable antimalarial  
187 antibody at V1 to detectable antibody at V2 (**Supplemental Figure S2**, **Supplemental Table S1**).



188 Nitric oxide

189 Nitric oxide (NO) is a molecular effector that is released by activated immune cells in their defense against  
190 parasite infection [38]. Increased plasma NO levels in adults and children have been associated with protection  
191 from malaria [39, 40, 41]. In order to determine whether age, sex, or treatment significantly affected NO levels  
192 in our population, we measured NO levels in plasma. We detected significant age-dependent effects on NO levels  
193 ( $p = 1.191 \times 10^{-10}$ ). However, we did not detect significant overall effects of treatment on NO concentrations.  
194 No significant sex-specific effect on NO was observed, although the variation in NO at both time points was  
195 substantially higher in infant females ( $sd_{V1} = 121.159$ ,  $sd_{V2} = 82.213$ ) than in infant males ( $sd_{V1} = 47.508$ ,  
196  $sd_{V2} = 49.970$ ) (**Figure 3**).

197 Plasma cytokines

198 To characterize the host immunological response to malaria infection and antimalarial treatment, we measured  
199 cytokine protein levels using a MILLIPLEX panel of nine analytes (TNF- $\alpha$ , IFN- $\gamma$ , IL-6, IL-12 (p40), IL-12  
200 (p70), IL-10, GM-CSF, sCD40L, and IL-1 $\beta$ ). To model our data, we used a nonparametric, rank-based statistical  
201 framework developed for paired longitudinal measurements to ask if: (1) there are significant main effects of  
202 treatment (i.e., visit), sex, and/or age, and (2) if there are significant interaction effects (age:sex, age:visit,  
203 sex:visit, age:sex:visit) on plasma cytokine levels in our population. We summarize our results below (**Figure**  
204 **3, Supplemental Table S2**).

205 *Pro-inflammatory cytokines*

206 We found a small, but highly significant, overall effect of visit on TNF- $\alpha$  levels ( $p = 1.282 \times 10^{-7}$ ), where  
207 treatment (V2) was associated with reduced levels. We also observed a significant overall effect of age ( $p =$   
208  $1.200 \times 10^{-7}$ ), where infants had higher overall levels compared with adults, and a marginally significant effect  
209 of sex ( $4.569 \times 10^{-2}$ )—males had higher average levels of TNF- $\alpha$  in both age groups and time-points. We  
210 observed a significant sex-specific effect on IFN- $\gamma$  levels ( $p = 2.048 \times 10^{-2}$ ), and an age:sex:visit interaction  
211 effect ( $p = 3.85 \times 10^{-3}$ ). We found that IL-6 decreased significantly after treatment ( $p = 1.907 \times 10^{-2}$ ). Even  
212 though we did not detect significant sex-based effects on IL-6, the discordant response we observed between  
213 infant and adult samples in males contrasted with the similar response we observed in both age groups in  
214 females. We observed a significant overall treatment effect on IL-12(p70) levels ( $p = 3.483 \times 10^{-6}$ ), where post-  
215 treatment levels were higher than during acute infection, and a nearly significant sex effect ( $p = 1.291 \times 10^{-2}$ )  
216 where males had slightly higher values at both time points and in both age groups. We observed no overall effect  
217 of age on IL-12(p40) levels, however we found that in males, there appeared to be a treatment effect in adults  
218 only, with higher IL-12(p40) levels after treatment, and in females, there appeared to be a treatment effect in



219 infants only, with higher IL-12(p40) levels after treatment. This manifested as a marginal age:sex:treat effect  
220 ( $p = 3.475 \times 10^{-2}$ ).

221 Observed levels of IL-1 $\beta$  were often below detectable limit, and the levels of sCD40L were often above the  
222 detectable range, making their quantification highly uncertain, and leading us to exclude those cytokine mea-  
223 surements from our analysis.

#### 224 *Anti-inflammatory cytokine and growth factor*

225 We observed a significant effect of visit (treatment) on plasma levels of IL-10 ( $p = 2.566 \times 10^{-15}$ ), where post-  
226 treatment levels were substantially lower than during acute infection. We also observed a significant effect of  
227 age on IL-10, where infants had significantly higher levels than adults at both time points ( $p = 3.305 \times 10^{-7}$ ).  
228 We observed a small but significant effect of treatment on levels of GM-CSF in the plasma ( $p = 1.151 \times 10^{-3}$ ),  
229 where post-treatment individuals had slightly elevated GM-CSF, regardless of age group. Males trended toward  
230 higher mean values across the two time points and ages.

#### 231 Treatment failure

232 Although we did not expect *a priori* for there to be antimalarial treatment failures in our cohort, we found  
233 that five individuals remained parasitaemic even after treatment, likely indicating treatment failure and/or  
234 reinfection by V2 (**Supplemental Figure S3**). Among the five, parasite levels were reduced by only  $\sim 5\%$   
235 in a single female infant, and by  $>97\%$  in the remaining 4 individuals. All five individuals had lower plasma  
236 IL-10 and TNF- $\alpha$  on V2 compared with V1, similar to the general effect across all study participants. However,  
237 notable among most of these subjects is the substantial decrease in IL-6 to very low levels on V2.

#### 238 Plasma cytokine ratios

239 The ratios of distinct plasma analytes, many of which simultaneously compete to modify the plasma immune  
240 milieu, may more precisely characterize the immune landscape at different levels of treatment, age, or sex. We  
241 examined the plasma cytokines, TNF- $\alpha$ , IFN- $\gamma$ , IL-6, IL-12(p70), IL-10, and GM-CSF, consisting of 15 pairwise  
242 analyte combinations, and analyzed effects of age, sex, and visit on their proportions. We found that there were  
243 significant overall effects of age in 10 of 15 of the proportions examined. In contrast to effects on individual  
244 analyte levels, we observed no overall sex-specific effects on analyte ratios. We found significant overall effects of  
245 treatment (visit) on 13 of 15 analyte proportions, and significant age effects on treatment response for five of 15  
246 proportions, with the most significant effects observed on IL-6 / IL-12(p70) treatment response ( $p = 1.385 \times 10^{-4}$ )  
247 and IL-6 / GM-CSF treatment response ( $p = 8.994 \times 10^{-4}$ ), where age reversed the direction of the treatment  
248 response in both cases (**Figure 4, Supplemental Table S3**). The most significant sex-dependent age effects

249 on treatment response that we observed were for IFN- $\gamma$  / IL-12(p70) ( $p = 8.849 \times 10^{-4}$ ) and IFN- $\gamma$  / GM-CSF  
250 ( $p = 9.116 \times 10^{-4}$ ).

### 251 Monocyte and Dendritic Cell Composition

252 Functional differences in immune responses and inflammatory signaling between individuals may be mediated  
253 by differences in the overall composition of monocytes and monocyte-derived cellular populations circulating  
254 in the blood. We did not observe any significant difference in percentages of CD33<sup>+</sup> cells based on age, sex, or  
255 visit/treatment, however we observed an overall trend for higher percentages in the second visit than during the  
256 first, and for higher levels in adults than infants (**Figure 5A**). We found that the proportion of myeloid dendritic  
257 cells (mDCs) among all PMBCs, while very small (often < 0.1%), was significantly higher post-treatment than  
258 during acute infection in all groups ( $p = 6.032 \times 10^{-8}$ ). In addition, nearly significant effects were observed for  
259 age ( $p = 4.665 \times 10^{-2}$ ) and an age:visit interactions ( $p = 4.282 \times 10^{-2}$ ), mostly due to lower mDC levels in  
260 infants vs. adults during the acute visit (similar levels of post-treatment mDCs) (**Figure 5B**).

261 Traditional, classical and patrolling monocytes serve different roles in pathogen surveillance, effector functions,  
262 and disease pathogenesis [42]. We observed a significant treatment effect on patrolling monocytes ( $p = 1.168^{-5}$ ),  
263 where levels increased significantly post-treatment in both infant and adult populations (**Figure 5C**). Although  
264 not significant, it appeared that age changed the direction of the treatment response for both inflammatory  
265 (**Figure 5D**) and traditional monocytes (**Figure 5E**). We observed a significant effect of treatment on the  
266 frequency of CD14<sup>low</sup> monocytes ( $p = 1.648 \times 10^{-2}$ ) as a percentage of the total CD16<sup>-</sup> monocytes (**Figure**  
267 **5F**).

268 A summary of p-values for age, sex, visit, and interaction effects for all analyte, analyte ratio, and cellular  
269 p-values is included in **Figure 6**.

### 270 Within-group age-dependent effects on analyte levels

271 Additional blood analyte heterogeneity within-group, adult or infant, may be caused by age-dependent effects  
272 that are not captured by the binary coding of age used in our main analysis. To identify continuous rather than  
273 categorical age effects, we used a linear model, fitting age (in years for adults, or fraction of years for infants)  
274 and age-by-sex effects for adults and infants separately, at each treatment timepoint, and fitting the same effects  
275 for the log<sub>2</sub>-fold change between acute and post-treatment visits. Although we found no significant effects on  
276 the treatment response (log<sub>2</sub>-fold change), we identified significant within-group age effects at both visit 1 and  
277 visit 2.

278 At visit 1, we found significant within-group age effects on infant TNF- $\alpha$  (ANOVA-like  $p = 0.008$ , decrease  
279 with age, appears to be driven by females) (**Figure 7A**), and on adult GM-CSF ( $p = 0.032$ , increase with age),

280 adult IL-12(p70) ( $p = 0.0475$ , slight decrease with age, not shown), and adult *Pfs16* ( $p = 0.00976$ , decrease with  
281 age), including substantial effects of age ( $p = 0.0032$ ) and age-by-sex interaction ( $p = 0.0027$ ) (**Figure 7B**).

282 At visit 2, we found significant within-group age effects on adult nitric oxide ( $p = 0.014$ , increase with age),  
283 including substantial effects of age ( $p = 0.017$ ) and age-by-sex interaction ( $p = 0.0093$ ) (**Figure 7C**).

## 284 Discussion

285 In order to resolve the ongoing problem of malaria transmission in endemic regions, substantial improvements in  
286 the quality and/or coverage of preventive measures and treatments are critical. Variation in the host immuno-  
287 logical response to infection and treatment may underlie variability in treatment efficacy and clinical outcomes,  
288 and infant and immune-compromised populations are especially at risk for adverse outcomes even when ade-  
289 quate antimalarials are available. In this study we evaluated age-related differences in the antimalarial treatment  
290 response in adults and infants acutely infected with *Plasmodium falciparum*, the predominant malaria parasite  
291 in southern Africa. We provide evidence for substantial widespread differences in immune regulatory factors and  
292 cellular effectors between adult and infant populations which are infected with *P. falciparum* and subsequently  
293 treated, suggesting that age-related factors may interfere with *both* host-intrinsic anti-parasite immunity as well  
294 as the host response to anti-parasite chemotherapy. This two-fold involvement of age effects presents an obstacle  
295 to potential vaccine and drug-mediated interventions to eliminate the transmission of malaria, especially in  
296 malaria endemic regions of Africa.

297 Immunological ontogeny and maturation is a process that is highly developmentally and environmentally  
298 regulated, and immune features, both at baseline and in response to stimuli, are subject to non-linear trajectories  
299 over a typical human lifespan. One of the major factors driving age-dependent differences in the treatment  
300 response to antimalarial drugs is immunity of the human host [43]. Thus we focused our efforts on understanding  
301 the immune response, based on measures collected in peripheral blood. In our study of age-specific effects on  
302 infection and treatment responses of infants and adults, we found substantial effects of age on blood-stage  
303 parasitemia, gametocytemia, and a greater risk of recrudescence or reinfection. In addition, blood marker levels  
304 were significantly different in infants compared with adults during acute infection, and changes in these levels  
305 in response to treatment also differed. When considering co-variation of blood analytes, in the form of cytokines  
306 ratios, we found that infant age modifies or reverses the effects of treatment. We observed age-related differences  
307 in the treatment response of myeloid DCs. Finally, we observed that within infant or adult age groups, continuous  
308 age effects, and age-by-sex effects, contributed to phenotypic differences observed at V1 and V2, sometime  
309 transgressing the observed group-wise age effects, shedding a light on the complexity of immune development  
310 at long-term and short-term time scales.

311 In our study, all subjects were infected, based on clinical features and rapid diagnostic test. However, among  
312 all infected individuals, we found that infant age was associated with increased numbers of mature gametocytes  
313 during acute infection, and decreased overall parasite clearance post-treatment. Infants exhibited significantly  
314 higher parasite loads during the first clinical visit, and higher levels of (*Pfs25*- expressing) mature gametocytes,  
315 reflecting potential differences in biology, disease presentation and/or healthcare seeking. It has been shown  
316 that transplacentally-transferred antibody decreases over time after birth [44]. We found total anti-Plasmodium  
317 IgG and IgM levels were detectable at a lower frequency in infants compared with adults, potentially conferring  
318 lower or higher levels of protection from pathology in infected individuals. Even so, the majority of infants tested  
319 positive, suggesting high rates of prior exposure in infants and/or retention of substantial detectable maternal  
320 antibody.

321 The role of nitric oxide (NO) in malaria is still controversial. Even as higher levels of NO are associated with  
322 CM and dyserythropoiesis, some studies have found that NO levels are often higher in asymptomatic children.  
323 Our results suggest that NO levels are upregulated in infants compared with adults, however these measures  
324 did not change between V1 and V2, and they did not correlate with parasitemia as other studies have found  
325 [45]. This may reflect our power to detect such effects given the size of our sample, or differences in regional or  
326 environmental factors contributing to NO levels in the blood.

327 One limitation of our current study is that we lacked clinical outcomes beyond a simple measure of parasitemia,  
328 limiting our ability to understand the impact of our blood phenotyping results on adverse outcomes; we excluded  
329 individuals with signs of SMA or CM, so the clinical variation in this study is by design very low. Even so, we  
330 were able to identify specific signatures of infant age that are associated with changes in the host antimalarial  
331 treatment response, flagging factors for future follow-up. Identifying categorical or quantitative clinical measures  
332 that differentiate successful treatment from unsuccessful treatment in different age groups could lead to more  
333 detailed recommendations for improving treatment protocols in vulnerable host populations.

334 Some important questions remain. Going forward, it will be important to understand not only the range of  
335 treatment responses between age groups, but the important and remediable age-associated factors that lead  
336 to recrudescence and/or rapid reinfection. Infants may have altered pharmacokinetics, tend to vomit doses of  
337 medicine, and/or have differential adherence to treatment compared with adults. Genotyping or sequencing of  
338 parasites in future studies will enable us to distinguish treatment failures from new infections. Carefully designed  
339 studies that take these factors into account more closely will help us to reduce risk of poor treatment outcomes  
340 in pediatric populations more effectively.

341 Information about prior clinical exposure will be important to consider, since even in areas of high malaria  
342 transmission, substantial heterogeneity of exposure is possible, regardless of age group. Indicators of current,  
343 or recent, parasite infection may differ substantially, due to the differences in sensitivity and specificity of

344 the assays conducted. A recent analysis of malaria rapid diagnostic tests suggests around 95% specificity and  
345 95% sensitivity of these assays [46]. However, as the antigens detected in these tests are often present even  
346 after effective treatment, they are not useful for determining frequency of treatment failures, and parasite  
347 microscopy methods are preferred. We used thick film microscopy at V1 and V2 to determine levels of parasite  
348 clearance, and in future work with larger sample sizes, more highly quantitative measurements can be taken  
349 to better characterize treatment failure rates. Several of our subjects had levels of parasites at V1 that were  
350 near or above the threshold considered *hyperparasitemic* (>400,000 parasites/ul). At this level, uncomplicated  
351 hyperparasitemia results in higher treatment failure rates, and indeed we observed treatment failures in those  
352 with some of the highest parasite levels at visit 1. Hospitalization may sometimes be required for individuals  
353 found to be parasitemic at this level, regardless of the level of other symptoms. Although we do not know  
354 whether the 5 individuals with detectable parasitemia on V2 were treatment failures or recurrences, evidence  
355 from this study can be used to inform future studies to test whether the associated cytokine signals are important  
356 risk factors for treatment failure and/or susceptibility to re-infection. Experimental animal models of malaria  
357 infection and antimalarial treatment may provide us with the ability to determine causality of age effects on  
358 differences in treatment outcomes, and specifically understand the pathways to recrudescence.

359 In our data, we found that at V1, twelve of the 63 individuals had family members with recent or current  
360 cases malaria (data not shown). We did not focus on identifying potential parasite transmission pathways,  
361 or family or location-specific risk factors that may also have played a role in the response to infection and  
362 treatment in this study, although we know they likely contributed to variation in disease outcomes. In addition,  
363 co-morbidities/co-infections were not reported, but may have noteworthy effects on post-infection interventions.  
364 Thus, genetic, environmental, and family-relatedness measures, as well as additional health record information,  
365 can be informative and influential in determining treatment outcomes, and is recommended to collect these data  
366 if at all feasible.

367 Age effects are important for pediatric chemotherapies more broadly, making infant-specific therapies an  
368 important focus for combating global pathogens and improving global health. Treatment failures in infants are  
369 may complicate a number of infections, such as pneumococcal infection, HIV infection, and others. Thus, in  
370 this work, we have helped to identify the role of both categorical age and continuous age on immune-related  
371 differences in the response to drug treatment after acute infection, with implications for how we understand  
372 the dynamics of immune development and effects of immune exposure to a broad range of pathogens across the  
373 lifespan.

374 It is clear that age plays a role in the eventual outcomes of complicated and uncomplicated malaria treatment.  
375 Prior studies have identified age-dependent treatment effects on infection recurrence [47] and treatment failure  
376 for a number of antimalarial drugs [48, 49, 50, 51, 52, 43]. Aside from age, there are a number of factors that

377 may contribute to variability in antimalarial treatment. Additional factors include level of regional malaria  
378 endemicity or prevalence, nutrition, immune status, prior infection with malaria, chemotherapeutic choice, and  
379 other co-infections or co-morbidities. The relative importance of these factors in driving the heterogeneity in  
380 antimalarial treatment responses is still to be understood.

## 381 Conclusion

382 In summary, our data shows that there are signatures from peripheral blood biomarkers that may indicate  
383 or mediate immune response differences infants and adults in a malaria endemic region. These differences in  
384 important inflammatory cytokines and cell populations may drive the clinical differences observed in disease  
385 risk between infants and adults, and furthermore sex effects may play a modifying role. Finally, the lack of  
386 efficacy of antimalarial therapy in some individuals, caused by incomplete clearance or repeat infection, may be  
387 a function of cytokine dysregulation in the host response, and identification of the regulatory pathways that are  
388 altered will be critical to improving chemotherapy outcomes in infants.

## 389 Declarations

### 390 Ethics Approval and Consent to Participate

391 The study was approved by the UNC-Chapel Hill Institutional Review Board (# 11-1906) and by the National Health Sciences Research Committee  
392 (NHSRC; # 882) that is part of the Ministry of Health in Malawi, in Lilongwe, Malawi. Informed parental consent was obtained. Institutional  
393 guidelines at UNC and at the UNC Project Malawi in Lilongwe, Malawi, strictly adhere to the World Medical Association's Declaration of Helsinki.

### 394 Consent for publication

395 Not Applicable.

### 396 Availability of data and material

397 The data file and analysis scripts we be made available in the malariaInfantStudy repository on GitHub at  
398 <https://github.com/mauriziopaul/malariaInfantStudy> upon publication.

### 399 Competing interests

400 The authors declare that they have no competing interests.

### 401 Funding

402 This research was supported by a Developmental Award to KDP by the Center for AIDS Research (5P30AI050410), and a UNC-CH Training Grant to  
403 PLM (5T32AI007419-23). In addition, KDP was supported by R01 AI100067.

### 404 Author's contributions

405 KDP conceived and designed the experiments. PLM, HF, and GT performed the experiments. MH oversaw the clinical studies in Malawi. PLM, HF,  
406 and KDP analyzed the data and wrote the paper, with feedback from all authors.

### 407 Acknowledgements

408 We acknowledge the assistance of Dr. Hyung-Suk Kim, from UNC Department of Pathology and Laboratory Medicine (retired), with the  
409 gametocytemia PCR methods.

410 **Author details**

411 <sup>1</sup> Present Address: Department of Medicine, Section of Genetic Medicine, The University of Chicago, 60637 Chicago, Illinois, USA. <sup>2</sup> Department of  
412 Genetics, University of North Carolina-Chapel Hill, 27599 Chapel Hill, North Carolina, USA. <sup>3</sup> Curriculum in Bioinformatics and Computational  
413 Biology, University of North Carolina-Chapel Hill, 27599 Chapel Hill, North Carolina, USA. <sup>4</sup> Department of Pathology, Microbiology & Immunology,  
414 Vanderbilt University, Nashville, Tennessee, USA. <sup>5</sup> Division of Infectious Diseases, Department of Medicine, University of North Carolina, 130  
415 Mason Farm Rd, Bioinformatics Bldg, 27599 Chapel Hill, North Carolina, USA. <sup>6</sup> University of North Carolina Project-Malawi, Lilongwe, Malawi. <sup>7</sup>  
416 Department of Microbiology and Immunology, University of North Carolina, 27599 Chapel Hill, North Carolina, USA.

417 **References**

- 418 1. Olin, A., Henckel, E., Chen, Y., Lakshmikanth, T., Pou, C., Mikes, J., Gustafsson, A., Bernhardtsson, A.K., Zhang, C., Bohlin, K., *et al.*:  
419 Stereotypic immune system development in newborn children. *Cell* **174**(5), 1277–1292 (2018). doi:[10.1016/j.cell.2018.06.045](https://doi.org/10.1016/j.cell.2018.06.045)
- 420 2. malERA Refresh Consultative Panel on Tools for Malaria Elimination, T.: malERA: An updated research agenda for diagnostics, drugs, vaccines,  
421 and vector control in malaria elimination and eradication. *PLOS Medicine* **14**(11), 1–35 (2017). doi:[10.1371/journal.pmed.1002455](https://doi.org/10.1371/journal.pmed.1002455)
- 422 3. Marsh, K., Kinyanjui, S.: Immune effector mechanisms in malaria. *Parasite Immunology* **28**(1-2), 51–60 (2006).  
423 doi:[10.1111/j.1365-3024.2006.00808.x](https://doi.org/10.1111/j.1365-3024.2006.00808.x)
- 424 4. Langhorne, J., Ndungu, F.M., Sponaas, A.-M., Marsh, K.: Immunity to malaria: more questions than answers. *Nature Immunology* **9**(7), 725  
425 (2008). doi:[10.1038/ni.f.205](https://doi.org/10.1038/ni.f.205)
- 426 5. Cowman, A.F., Healer, J., Marapana, D., Marsh, K.: Malaria: Biology and disease. *Cell* **167**(3), 610–624 (2016). doi:[10.1016/j.cell.2016.07.055](https://doi.org/10.1016/j.cell.2016.07.055)
- 427 6. Baird, J.K.: Host age as a determinant of naturally acquired immunity to *Plasmodium falciparum*. *Parasitology Today* **11**(3), 105–111 (1995).  
428 doi:[10.1016/0169-4758\(95\)80167-7](https://doi.org/10.1016/0169-4758(95)80167-7)
- 429 7. Doolan, D.L., Dobaño, C., Baird, J.K.: Acquired immunity to malaria. *Clinical Microbiology Reviews* **22**(1), 13–36 (2009).  
430 doi:[10.1128/CMR.00025-08](https://doi.org/10.1128/CMR.00025-08)
- 431 8. Guinovart, C., Dobaño, C., Bassat, Q., Nhabomba, A., Quintó, L., Manaca, M.N., Aguilar, R., Rodríguez, M.H., Barbosa, A., Aponte, J.J., *et al.*:  
432 The role of age and exposure to *plasmodium falciparum* in the rate of acquisition of naturally acquired immunity: a randomized controlled  
433 trial. *PLoS One* **7**(3), 32362 (2012). doi:[10.1371/journal.pone.0032362](https://doi.org/10.1371/journal.pone.0032362)
- 434 9. Tran, T.M., Li, S., Doumbo, S., Doumtabe, D., Huang, C.-Y., Dia, S., Bathily, A., Sangala, J., Kone, Y., Traore, A., *et al.*: An intensive  
435 longitudinal cohort study of Malian children and adults reveals no evidence of acquired immunity to *plasmodium falciparum* infection. *Clinical*  
436 *Infectious Diseases* **57**(1), 40–47 (2013). doi:[10.1093/cid/cit174](https://doi.org/10.1093/cid/cit174)
- 437 10. Griffin, J.T., Hollingsworth, T.D., Reyburn, H., Drakeley, C.J., Riley, E.M., Ghani, A.C.: Gradual acquisition of immunity to severe malaria with  
438 increasing exposure. *Proceedings. Biological Sciences / The Royal Society* **282**(1801), 20142657 (2015). doi:[10.1098/rspb.2014.2657](https://doi.org/10.1098/rspb.2014.2657)
- 439 11. Wykes, M.N., Stephens, R., Cockburn, I.A.: In: Mota, M.M., Rodriguez, A. (eds.) *Adaptive Immunity to Plasmodium Blood Stages*, pp. 47–66.  
440 Springer, Cham, Switzerland (2017). doi:[10.1007/978-3-319-45210-4](https://doi.org/10.1007/978-3-319-45210-4)
- 441 12. Ouédraogo, A.L., Roeffen, W., Luty, A.J.F., de Vlas, S.J., Nebie, I., Ilboudo-Sanogo, E., Cuzin-Ouattara, N., Teleen, K., Tiono, A.B., Sirima,  
442 S.B., Verhave, J.P., Bousema, T., Sauerwein, R.: Naturally acquired immune responses to *Plasmodium falciparum* sexual stage antigens  
443 Pfs48/45 and Pfs230 in an area of seasonal transmission. *Infection and Immunity* **79**(12), 4957–4964 (2011). doi:[10.1128/IAI.05288-11](https://doi.org/10.1128/IAI.05288-11)
- 444 13. Dobaño, C., Quelhas, D., Quintó, L., Puyol, L., Serra-Casas, E., Mayor, A., Nhampossa, T., Macete, E., Aide, P., Mandomando, I., Sanz, S.,  
445 Puniya, S.K., Singh, B., Gupta, P., Bhattacharya, A., Chauhan, V.S., Aponte, J.J., Chitnis, C.E., Alonso, P.L., Menéndez, C.: Age-dependent  
446 IgG subclass responses to *Plasmodium falciparum* EBA-175 are differentially associated with incidence of malaria in Mozambican children.  
447 *Clinical and Vaccine Immunology* **19**(2), 157–166 (2012). doi:[10.1128/CVI.05523-11](https://doi.org/10.1128/CVI.05523-11)
- 448 14. Nogaró, S.I., Hafalla, J.C., Walther, B., Remarque, E.J., Tetteh, K.K.A., Conway, D.J., Riley, E.M., Walther, M.: The breadth, but not the  
449 magnitude, of circulating memory B cell responses to *P. falciparum* increases with age/exposure in an area of low transmission. *PLoS ONE* **6**(10)  
450 (2011). doi:[10.1371/journal.pone.0025582](https://doi.org/10.1371/journal.pone.0025582)
- 451 15. Ndour, P.A., Lopera-Mesa, T.M., Diakité, S.A.S., Chiang, S., Mouri, O., Roussel, C., Jauréguiberry, S., Biligui, S., Kendjo, E., Claessens, A.,  
452 Ciceron, L., Mazier, D., Thellier, M., Diakité, M., Fairhurst, R.M., Buffet, P.A.: *Plasmodium falciparum* clearance is rapid and pitting independent  
453 in immune Malian children treated with artesunate for malaria. *Journal of Infectious Diseases* **211**(2), 290–297 (2015). doi:[10.1093/infdis/jiu427](https://doi.org/10.1093/infdis/jiu427)
- 454 16. Higgins, S.J., Kain, K.C., Liles, W.C.: Immunopathogenesis of falciparum malaria: implications for adjunctive therapy in the management of  
455 severe and cerebral malaria. *Expert Review of Anti-infective Therapy* **9**(9), 803–819 (2011). doi:[10.1586/eri.11.96](https://doi.org/10.1586/eri.11.96)
- 456 17. Frosch, A.E.P., John, C.C.: Immunomodulation in plasmodium falciparum malaria: experiments in nature and their conflicting implications for  
457 potential therapeutic agents. *Expert Review of Anti-infective Therapy* **10**(11), 1343–1356 (2012). doi:[10.1586/eri.12.118](https://doi.org/10.1586/eri.12.118)
- 458 18. Dende, C., Meena, J., Nagarajan, P., Panda, A.K., Rangarajan, P.N., Padmanaban, G.: Simultaneously targeting inflammatory response and  
459 parasite sequestration in brain to treat Experimental Cerebral Malaria. *Scientific Reports* **5**, 12671 (2015). doi:[10.1038/srep12671](https://doi.org/10.1038/srep12671)
- 460 19. Varo, R., Crowley, V.M., Siteo, A., Madrid, L., Serghides, L., Kain, K.C., Bassat, Q.: Adjunctive therapy for severe malaria: a review and critical



- 461 appraisal. *Malaria Journal* **17**(1), 47 (2018). doi:[10.1186/s12936-018-2195-7](https://doi.org/10.1186/s12936-018-2195-7)
- 462 20. Kim, H.S., Smithies, O.: Recombinant fragment assay for gene targetting based on the polymerase chain reaction. *Nucleic Acids Research*
- 463 **16**(18), 8887–903 (1988). doi:[10.1093/nar/16.18.8887](https://doi.org/10.1093/nar/16.18.8887)
- 464 21. Wampfler, R., Timinao, L., Beck, H.-P., Soulama, I., Tiono, a.B., Siba, P., Mueller, I., Felger, I.: Novel Genotyping Tools for Investigating
- 465 Transmission Dynamics of *Plasmodium falciparum*. *Journal of Infectious Diseases* **210**(8), 1188–1197 (2014). doi:[10.1093/infdis/jiu236](https://doi.org/10.1093/infdis/jiu236)
- 466 22. Schneider, P., Schoone, G., Schallig, H., Verhage, D., Telgt, D., Eling, W., Sauerwein, R.: Quantification of *Plasmodium falciparum* gametocytes
- 467 in differential stages of development by quantitative nucleic acid sequence-based amplification. *Molecular and Biochemical Parasitology* **137**(1),
- 468 35–41 (2004). doi:[10.1016/j.molbiopara.2004.03.018](https://doi.org/10.1016/j.molbiopara.2004.03.018)
- 469 23. Williamson, K.C., Keister, D.B., Muratova, O., Kaslow, D.C.: Recombinant Pfs230, a *plasmodium falciparum* gametocyte protein, induces
- 470 antisera that reduce the infectivity of *plasmodium falciparum* to mosquitoes. *Molecular and Biochemical Parasitology* **75**(1), 33–42 (1995).
- 471 doi:[10.1016/j.molbiopara.2004.03.018](https://doi.org/10.1016/j.molbiopara.2004.03.018)
- 472 24. Stone, W.J., Campo, J.J., Ouédraogo, A.L., Meerstein-Kessel, L., Morlais, I., Da, D., Cohuet, A., Nsango, S., Sutherland, C.J., Vegte-Bolmer,
- 473 M., *et al.*: Unravelling the immune signature of *Plasmodium falciparum* transmission-reducing immunity. *Nature Communications* **9**(1), 558
- 474 (2018). doi:[10.1038/s41467-017-02646-2](https://doi.org/10.1038/s41467-017-02646-2)
- 475 25. R Core Team: R: A Language and Environment for Statistical Computing. R Foundation for Statistical Computing, Vienna, Austria (2018). R
- 476 Foundation for Statistical Computing. <https://www.R-project.org/>
- 477 26. Lambert, D.: Zero-inflated poisson regression, with an application to defects in manufacturing. *Technometrics* **34**(1), 1–14 (1992).
- 478 doi:[10.2307/1269547](https://doi.org/10.2307/1269547)
- 479 27. Zeileis, A., Kleiber, C., Jackman, S.: Regression models for count data in R. *Journal of Statistical Software* **27**(8), 1–25 (2008).
- 480 doi:[10.18637/jss.v027.i08](https://doi.org/10.18637/jss.v027.i08)
- 481 28. Jackman, S.: pscl: Classes and Methods for R Developed in the Political Science Computational Laboratory. United States Studies Centre,
- 482 University of Sydney, Sydney, New South Wales, Australia (2017). United States Studies Centre, University of Sydney. R package version 1.5.2.
- 483 <https://github.com/atahk/pscl/>
- 484 29. Hothorn, T., Hornik, K., van de Wiel, M.A., Zeileis, A.: Implementing a Class of Permutation Tests: The coin Package. *Journal of Statistical*
- 485 *Software* **28**(8), 1–23 (2008). doi:[10.18637/jss.v028.i08](https://doi.org/10.18637/jss.v028.i08)
- 486 30. Agresti, A.: *Categorical Data Analysis*. Wiley Series in Probability and Statistics. Wiley, New Jersey (2013). ISBN 978-0-470-46363-5.
- 487 <https://books.google.com/books?id=6PHHE1Cr44AC>
- 488 31. Venables, W.N., Ripley, B.D.: *Modern Applied Statistics with S*, 4th edn. Springer, New York (2002). ISBN 0-387-95457-0.
- 489 <http://www.stats.ox.ac.uk/pub/MASS4>
- 490 32. Akritas, M.G., Arnold, S.F., Brunner, E.: Nonparametric hypotheses and rank statistics for unbalanced factorial designs. *Journal of the American*
- 491 *Statistical Association* **92**(437), 258–265 (1997). doi:[10.1080/01621459.1997.10473623](https://doi.org/10.1080/01621459.1997.10473623)
- 492 33. Zhuang, Y., Guan, Y., Qiu, L., Lai, M., Tan, M.T., Chen, P.: A novel rank-based non-parametric method for longitudinal ordinal data. *Statistical*
- 493 *Methods in Medical Research* **27**(9), 2775–2794 (2018). doi:[10.1177/0962280216686628](https://doi.org/10.1177/0962280216686628). PMID: 28067124
- 494 34. Noguchi, K., Gel, Y.R., Brunner, E., Konietzschke, F.: nparLD : An R Software Package for the Nonparametric Analysis of Longitudinal Data in
- 495 Factorial Experiments. *Journal of Statistical Software* **50**(12), 1–23 (2012). doi:[10.18637/jss.v050.i12](https://doi.org/10.18637/jss.v050.i12)
- 496 35. Brunner, E., Domhof, S., Langer, F.: *Nonparametric Analysis of Longitudinal Data in Factorial Experiments*, 1st edn., pp. 1–261. John Wiley and
- 497 Sons, Inc, New York, New York, USA (2002). <https://books.google.com/books?id=UxzvAAAAMAAJ>
- 498 36. Ménard, R., Tavares, J., Cockburn, I., Markus, M., Zavala, F., Amino, R.: Looking under the skin: the first steps in malarial infection and
- 499 immunity. *Nature Reviews Microbiology* **11**(10), 701 (2013). doi:[10.1038/nrmicro3111](https://doi.org/10.1038/nrmicro3111)
- 500 37. Crompton, P.D., Moebius, J., Portugal, S., Waisberg, M., Hart, G., Garver, L.S., Miller, L.H., Barillas-Mury, C., Pierce, S.K.: Malaria immunity
- 501 in man and mosquito: insights into unsolved mysteries of a deadly infectious disease. *Annual Review of Immunology* **32**, 157–187 (2014).
- 502 doi:[10.1146/annurev-immunol-032713-120220](https://doi.org/10.1146/annurev-immunol-032713-120220)
- 503 38. Anstey, N.M., Weinberg, J.B., Granger, D.L.: Nitric oxide in malaria. In: *Nitric Oxide and Infection*, pp. 311–341. Springer, Boston, MA (2002).
- 504 doi:[10.1007/b111485](https://doi.org/10.1007/b111485)
- 505 39. Hobbs, M.R., Udhayakumar, V., Levesque, M.C., Booth, J., Roberts, J.M., Tkachuk, A.N., Pole, A., Coon, H., Kariuki, S., Nahlen, B.L., *et al.*:
- 506 A new NOS2 promoter polymorphism associated with increased nitric oxide production and protection from severe malaria in Tanzanian and
- 507 Kenyan children. *The Lancet* **360**(9344), 1468–1475 (2002). doi:[10.1016/S0140-6736\(02\)11474-7](https://doi.org/10.1016/S0140-6736(02)11474-7)
- 508 40. Kun, J.F., Mordmüller, B., Perkins, D.J., May, J., Mercereau-Puijalon, O., Alpers, M., Weinberg, J.B., Kremsner, P.G.: Nitric oxide synthase
- 509 2Iambaréné (g-954c), increased nitric oxide production, and protection against malaria. *The Journal of Infectious Diseases* **184**(3), 330–336
- 510 (2001). doi:[10.1086/322037](https://doi.org/10.1086/322037)
- 511 41. Morahan, G., Boutlis, C., Huang, D., Pain, A., Saunders, J., Hobbs, M., Granger, D., Weinberg, J., Peshu, N., Mwaikambo, E., *et al.*: A

- 512 promoter polymorphism in the gene encoding interleukin-12 p40 (IL12B) is associated with mortality from cerebral malaria and with reduced  
513 nitric oxide production. *Genes and Immunity* **3**(7), 414 (2002). doi:[10.1038/sj.gene.6363909](https://doi.org/10.1038/sj.gene.6363909)
- 514 42. Cros, J., Cagnard, N., Woollard, K., Patey, N., Zhang, S.-Y., Senechal, B., Puel, A., Biswas, S.K., Moshous, D., Picard, C., *et al.*: Human  
515 CD14dim monocytes patrol and sense nucleic acids and viruses via TLR7 and TLR8 receptors. *Immunity* **33**(3), 375–386 (2010).  
516 doi:[10.1016/j.immuni.2010.08.012](https://doi.org/10.1016/j.immuni.2010.08.012)
- 517 43. Rogerson, S.J., Wijesinghe, R.S., Meshnick, S.R.: Host immunity as a determinant of treatment outcome in *Plasmodium falciparum* malaria. *The*  
518 *Lancet Infectious Diseases* **10**(1), 51–59 (2010). doi:[10.1016/S1473-3099\(09\)70322-6](https://doi.org/10.1016/S1473-3099(09)70322-6)
- 519 44. Wilson, P.T., Malhotra, I., Mungai, P., King, C.L., Dent, A.E.: Transplacentally transferred functional antibodies against *Plasmodium falciparum*  
520 decrease with age. *Acta tropica* **128**(1), 149–153 (2013). doi:[10.1016/j.actatropica.2013.07.018](https://doi.org/10.1016/j.actatropica.2013.07.018)
- 521 45. Boutlis, C.S., Weinberg, J.B., Baker, J., Bockarie, M.J., Mgone, C.S., Cheng, Q., Anstey, N.M.: Nitric Oxide Production and Nitric Oxide  
522 Synthase Activity in Malaria-Exposed Papua New Guinean Children and Adults Show Longitudinal Stability and No Association with Parasitemia.  
523 *Infection and Immunity* **72**(12), 6932–6938 (2004). doi:[10.1128/IAI.72.12.6932-6938.2004](https://doi.org/10.1128/IAI.72.12.6932-6938.2004)
- 524 46. Abba, K., Deeks, J.J., Olliaro, P.L., Naing, C.-M., Jackson, S.M., Takwoingi, Y., Donegan, S., Garner, P.: Rapid diagnostic tests for diagnosing  
525 uncomplicated *P. falciparum* malaria in endemic countries. *Cochrane Database of Systematic Reviews* (7), 008122 (2011).  
526 doi:[10.1002/14651858.CD008122.pub2](https://doi.org/10.1002/14651858.CD008122.pub2)
- 527 47. Borrmann, S., Matsiegui, P.-B., Missinou, M.A., Kremsner, P.G.: Effects of *plasmodium falciparum* parasite population size and patient age on  
528 early and late parasitological outcomes of antimalarial treatment in children. *Antimicrobial agents and chemotherapy* **52**(5), 1799–1805 (2008).  
529 doi:[10.1128/AAC.00755-07](https://doi.org/10.1128/AAC.00755-07)
- 530 48. ter Kuile, F.O., Luxemburger, C., Nosten, F., Thwai, K.L., Chongsuphajaisiddhi, T., White, N.J.: Predictors of mefloquine treatment failure: a  
531 prospective study of 1590 patients with uncomplicated *falciparum* malaria. *Transactions of the Royal Society of Tropical Medicine and Hygiene*  
532 **89**(6), 660–664 (1995). doi:[10.1016/0035-9203\(95\)90435-2](https://doi.org/10.1016/0035-9203(95)90435-2)
- 533 49. Ekvall, H., Premji, Z., Björkman, A.: Chloroquine treatment for uncomplicated childhood malaria in an area with drug resistance: early treatment  
534 failure aggravates anaemia. *Transactions of the Royal Society of Tropical Medicine and Hygiene* **92**(5), 556–560 (1998).  
535 doi:[10.1016/S0035-9203\(98\)90913-0](https://doi.org/10.1016/S0035-9203(98)90913-0)
- 536 50. Olanrewaju, W., Johnson, A.: Chloroquine-resistant *plasmodium falciparum* malaria in ilorin, nigeria: prevalence and risk factors for treatment  
537 failure. *African Journal of Medicine and Medical Sciences* **30**(3), 165–169 (2001)
- 538 51. Dorsey, G., Kamya, M.R., Ndeez, G., Babirye, J.N., Phares, C.R., Olson, J.E., Katabira, E.T., Rosenthal, P.J.: Predictors of chloroquine  
539 treatment failure in children and adults with *falciparum* malaria in Kampala, Uganda. *The American Journal of Tropical Medicine and Hygiene*  
540 **62**(6), 686–692 (2000). doi:[10.4269/ajtmh.2000.62.686](https://doi.org/10.4269/ajtmh.2000.62.686)
- 541 52. Dorsey, G., Gasasira, A.F., Machekano, R., Kamya, M.R., Staedke, S.G., Hubbard, A.: The impact of age, temperature, and parasite density on  
542 treatment outcomes from antimalarial clinical trials in Kampala, Uganda. *The American Journal of Tropical Medicine and Hygiene* **71**(5),  
543 531–536 (2004). doi:[10.4269/ajtmh.2004.71.531](https://doi.org/10.4269/ajtmh.2004.71.531)
- 544 53. Box, G.E.P., Cox, D.R.: An analysis of transformations. *Journal of the Royal Statistical Society. Series B (Methodological)* **26**(2), 211–252  
545 (1964)
- 546 54. Mukherjee, P., Chauhan, V.S.: *Plasmodium falciparum*-free merozoites and infected RBCs distinctly affect soluble CD40 ligand-mediated  
547 maturation of immature monocyte-derived dendritic cells. *Journal of Leukocyte Biology* **84**(1), 244–254 (2008). doi:[10.1189/jlb.0807565](https://doi.org/10.1189/jlb.0807565)
- 548 55. Kuznetsova, A., Brockhoff, P.B., Christensen, R.H.B.: lmerTest package: Tests in linear mixed effects models. *Journal of Statistical Software*  
549 **82**(13), 1–26 (2017). doi:[10.18637/jss.v082.i13](https://doi.org/10.18637/jss.v082.i13)

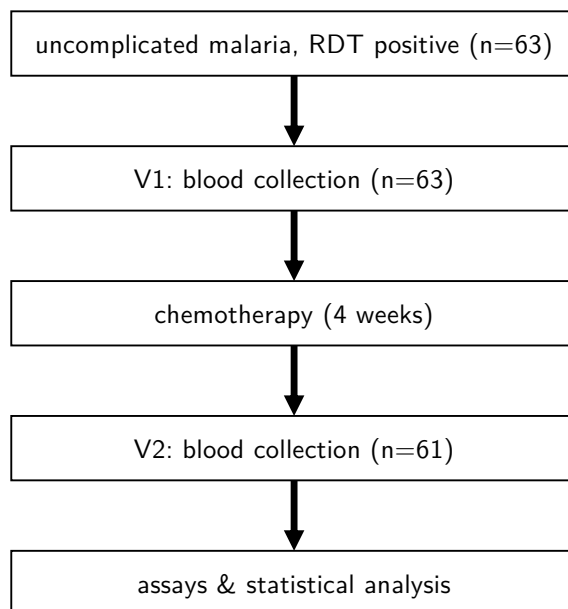

Figure 1: Study population and data collection.

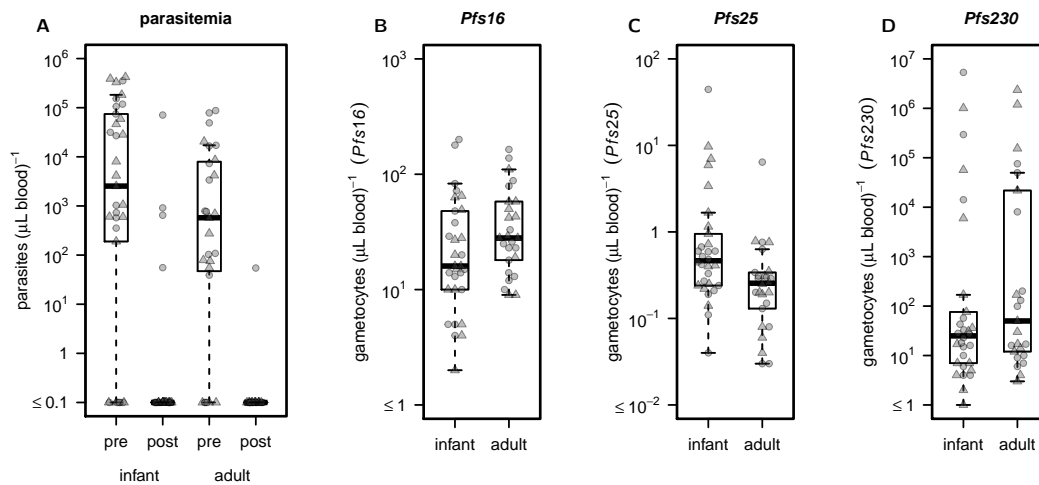

**Figure 2: Infant age is associated with increases in blood-stage parasitemia and gametocytemia during acute infection, and incomplete parasite clearance post-treatment.** Parasite load (parasites/ $\mu\text{L}$  in whole blood) (A) was measured in infants and adults by whole blood microscopy. Gametocytemia was measured using quantitative real-time PCR on cDNAs prepared from dried blood spot RNA, and gametocyte quantification was based on stage-specific expression of the following *Plasmodium falciparum* genes during acute infection: *Pfs16* (early gametocyte) (B); *Pfs25* (mature gametocyte) (C); and *Pfs230* (candidate gametocyte gene for transmission-blocking vaccine) (D), presented as gametocytes/ $\mu\text{L}$ . Circular data points indicate female subjects, and triangles indicate male subjects.

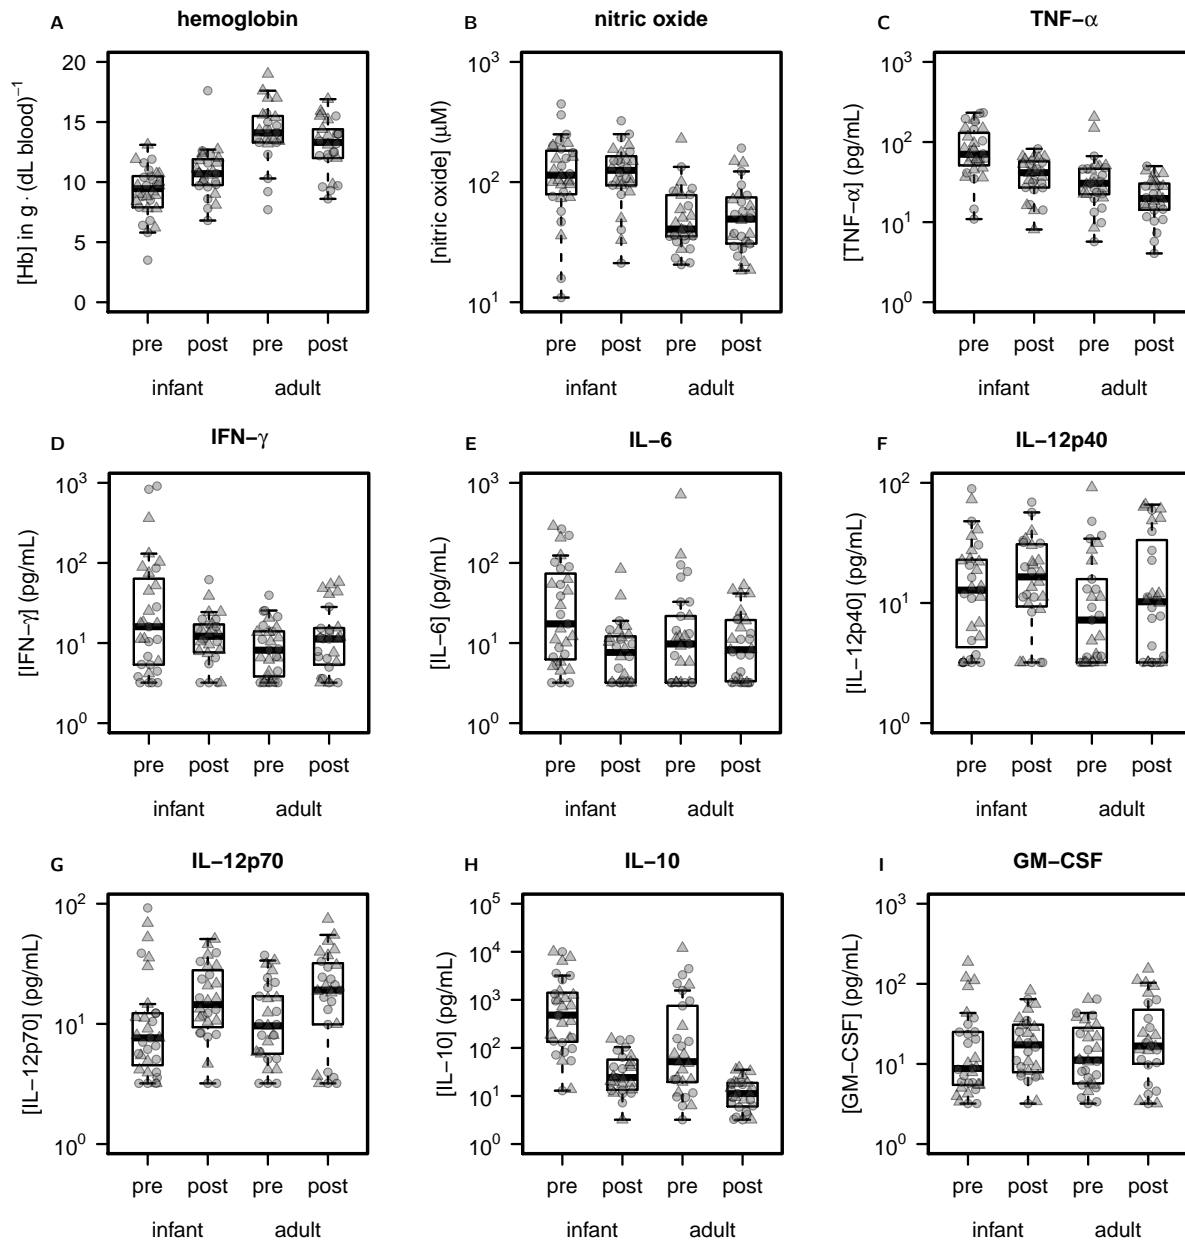

**Figure 3: Blood markers in infants differ significantly from adults during acute infection, and respond differentially to antimalarial treatment.** The concentrations of the following analytes were assayed, for adult and infant samples collected during acute infection and post-treatment (in pg/mL): (A) TNF- $\alpha$ , (B) IFN- $\gamma$ , (C) IL-6, (D) IL-12(p40), (E) IL-12(p70), (F) IL-10, and (G) GM-CSF. Levels of (H) hemoglobin in whole blood (g/dL) and (I) nitric oxide ( $\mu$ M) in plasma were also analyzed. Concentrations are presented for acute infection and post-treatment, and stratified by age group. Circles indicate females, and triangles indicate males.

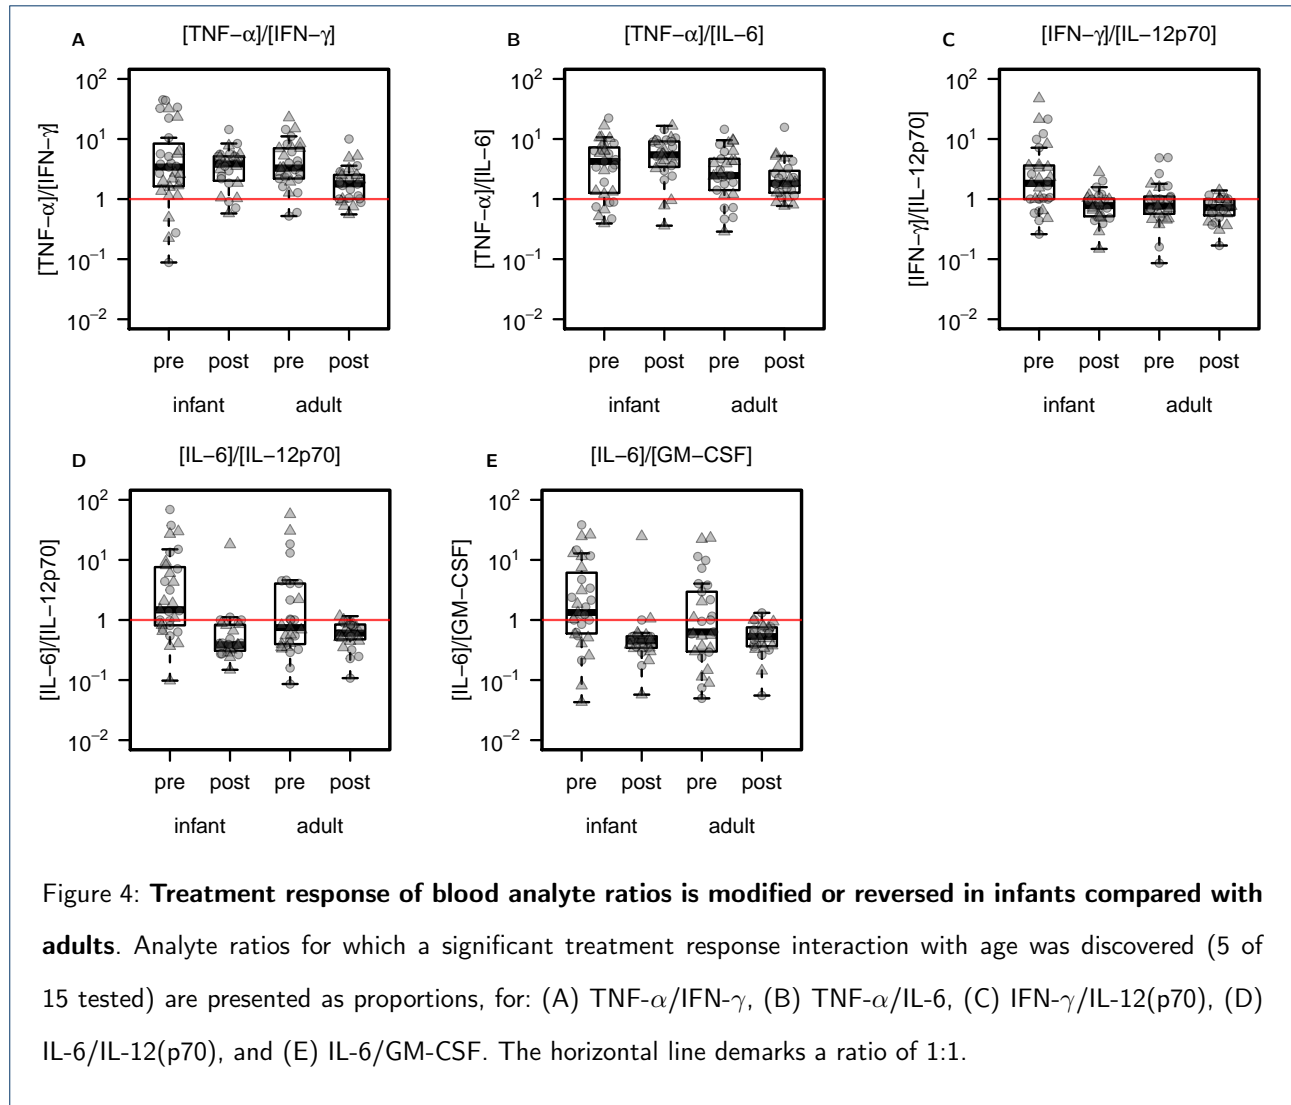

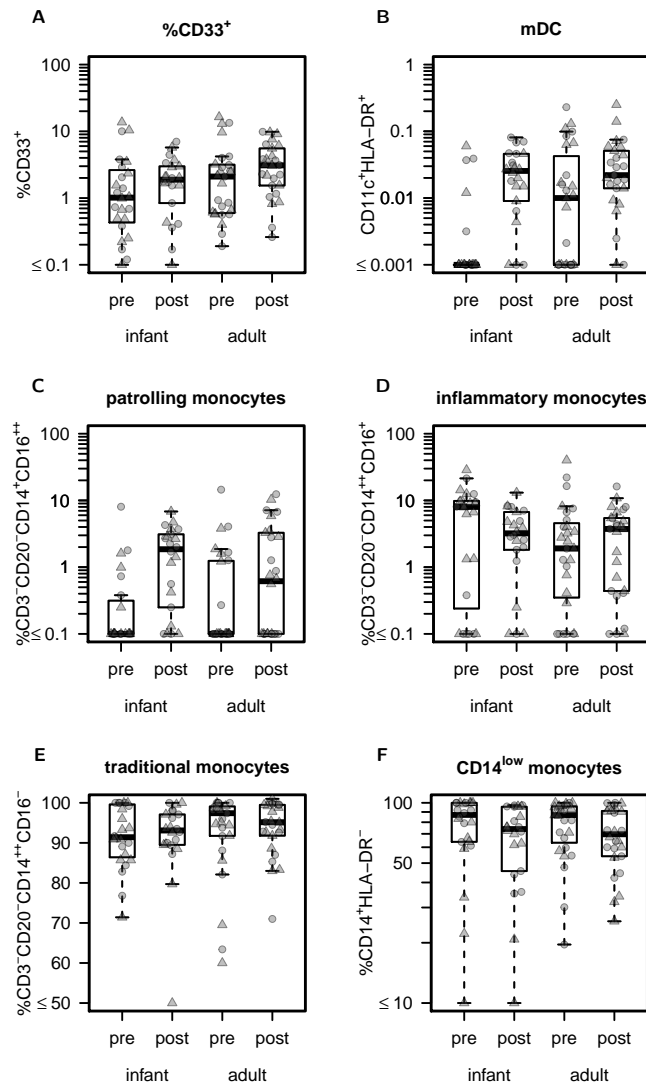

Figure 5: **Differences in the composition of myeloid DCs, patrolling monocytes, and CD14<sup>low</sup> monocytes based on age and/or visit.** The percent composition of (A) CD33<sup>+</sup> cells, (B) mDCs among all viable PBMCs is shown. The percent composition of (C) patrolling, (D) inflammatory, and (E) traditional monocyte subsets, as a fraction of all monocytes, as well as (F) the percent of CD14<sup>low</sup> monocytes, as a percentage of all CD16<sup>+</sup> monocytes, are shown. Percentages are stratified by age group and visit.



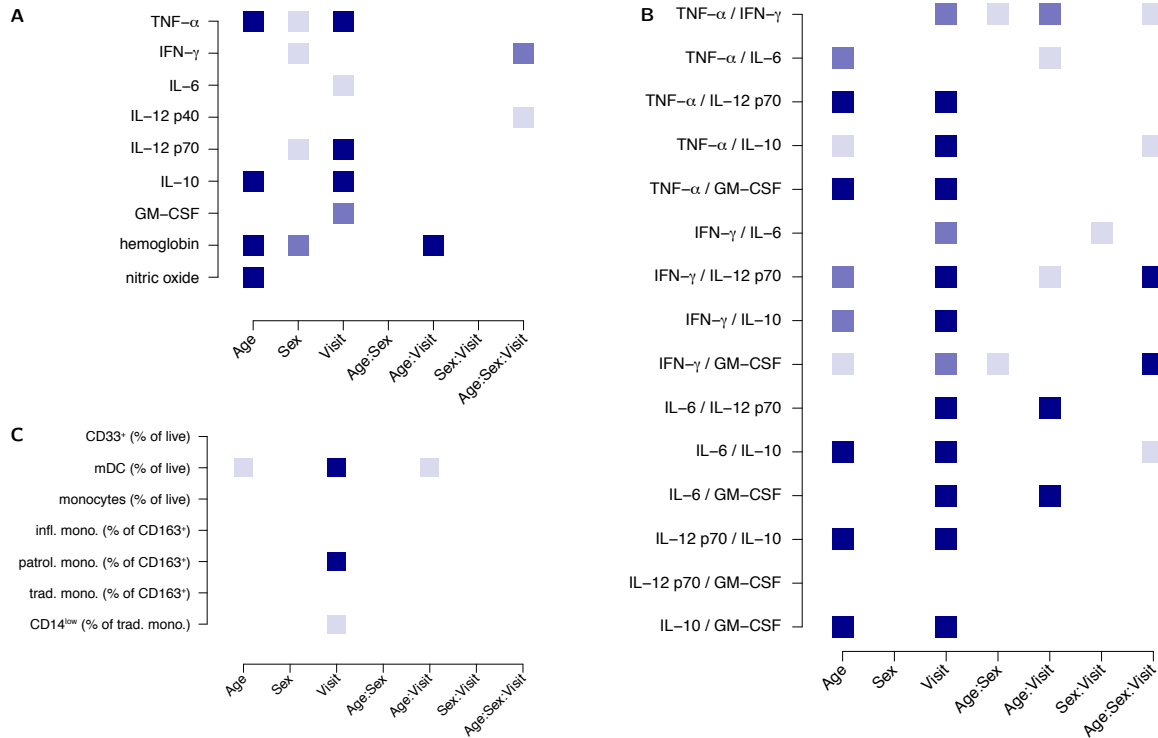

Figure 6: **Significant factors and interactions on blood analytes, analyte ratios, and cellular phenotypes identified in this study.** Nominal p-values for factors identified by nonparametric analysis of blood analytes (A), analyte proportions (B), and cellular data (C) are indicated by color (light blue:  $p < 0.05$ ; medium blue:  $p < 0.01$ ; dark blue:  $p < 0.001$ ).

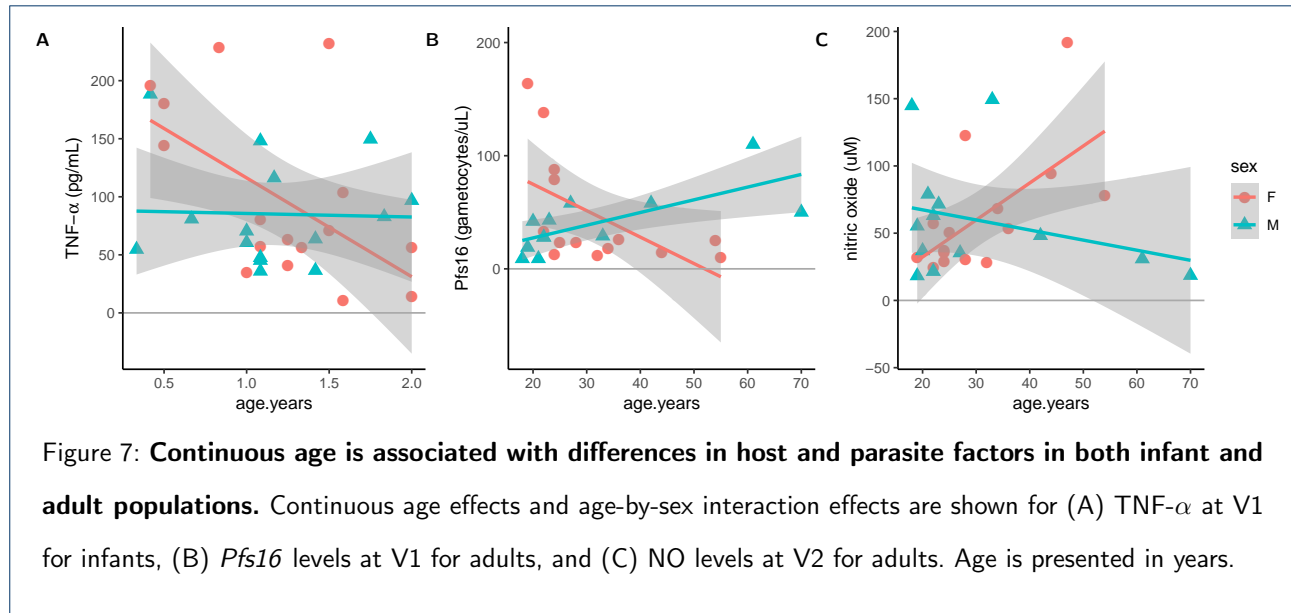

|                                                           | <b>Infants</b> |         | <b>Adults</b> |          |
|-----------------------------------------------------------|----------------|---------|---------------|----------|
| <b>Acute</b>                                              |                |         |               |          |
| No. of Participants                                       | 34             |         | 29            |          |
| Age, yrs                                                  | 0 – 2          |         | 19 – 70       |          |
| Hemoglobin, g/dL blood                                    | 9.16           | (2.06)  | 14.05         | (2.53)   |
| Parasite load, $\mu\text{l}^{-1}$ blood ( $\times 10^4$ ) | 7.08           | (12.4)  | 1.10          | (2.32)   |
| Gametocytemia, $\mu\text{l}^{-1}$ blood                   |                |         |               |          |
| Pfs16                                                     | 36.97          | (47.25) | 44.19         | (40.69)  |
| Pfs25                                                     | 2.74           | (8.19)  | 0.517         | (1.22)   |
| Pfs230 ( $\times 10^5$ )                                  | 2.24           | (9.83)  | 15.6          | (70.2)   |
| % positive for anti- <i>Plasmodium</i> Ab                 | 50.00          |         | 79.31         |          |
| <b>Post-treatment</b>                                     |                |         |               |          |
| Hemoglobin, g/dL blood                                    | 10.76          | (2.02)  | 13.03         | (2.23)   |
| Parasite load, $\mu\text{l}^{-1}$ blood ( $\times 10^4$ ) | 0.2589         | (1.338) | 0.0002        | (0.0011) |
| % positive for anti- <i>Plasmodium</i> Ab                 | 44.12          |         | 65.52         |          |

Table 1: **Clinical characteristics of study participants.** Where applicable, values are given as mean (1 s.d.).

## Supplemental Materials for Malaria Infant Study

### Supplemental Methods

#### Supplemental Statistical Methods

##### *Parametric analysis of analytes*

In order to properly transform our data prior to using a linear mixed model, we first handled heteroskedasticity of the residuals using a power transform based on a Box-Cox analysis. We start by fitting our data using a linear model:

$$y^{\text{raw}} = \beta_{\text{age}} + \beta_{\text{sex}} + \beta_{\text{visit}} + \beta_{\text{age:sex}} + \beta_{\text{age:visit}} + \beta_{\text{sex:visit}} + \beta_{\text{age:sex:visit}} + \varepsilon \quad (1)$$

where the values for  $\varepsilon$  are i.i.d. normal. We then use this fit to determine the value of  $\lambda$  with the maximum log likelihood, where  $\lambda$  represents the exponent and divisor in the following data transform:

$$y_i^{\{\lambda\}} = \begin{cases} (y_i^\lambda - 1)/\lambda & \text{if } y \neq 0 \\ \log(y) & \text{if } y = 0 \end{cases} \quad (2)$$

where log is the natural log, according to [53], implemented in the R package MASS [31]. After finding approximate optimal values of lambda, the transforms used for each phenotypes are as follows, where fractions represent the values of lambda used, “none” represents no transformation, and “log” is the natural log transformation:

| analyte:   | GM-CSF | IFN- $\gamma$ | IL-10 | IL-12(p40) | IL-12(p70) | IL-6 | TNF- $\alpha$ | hemoglobin | nitric oxide |
|------------|--------|---------------|-------|------------|------------|------|---------------|------------|--------------|
| transform: | -1/3   | -1/2          | -1/3  | -1/3       | [log]      | -1/2 | [log]         | [none]     | [log]        |

The quantile-quantile (Q-Q) plots are shown before and after the power transformations are applied in **Figure S4**. We then applied a linear mixed model to the transformed data, according to the same model in equation (1), but adding individual-level random slopes (for visit).

#### Supplemental Results

##### *Results for sCD40L and IL-1 $\beta$*

Soluble CD40 ligand (sCD40L, also known as sCD154) has been shown to induce DC maturation following *Plasmodium* infection in vitro, which can result in release of TNF- $\alpha$  and IL-12(p70) [54]. We observed a marginal visit effect ( $p = 8.783 \times 10^{-3}$ ), with higher levels post-treatment, as well as a marginal sex-specific effect on sCD40L ( $p = 6.734 \times 10^{-3}$ ), with higher overall levels in males. However, the distribution of phenotypes was

571 near the upper detection limit for this cytokine, which may have reduced our ability to detect differences  
572 based on treatment, age, and sex. We found that IL-1 $\beta$  levels in plasma increased significantly after treatment  
573 ( $p = 9.162 \times 10^{-4}$ ), and we found no other significant effects. This cytokine was at the lower limit of detection,  
574 which may have also reduced our ability to detect significant effects.

575 *Linear mixed model analysis of analytes*

576 We expect subtle differences in our main results based on the model that is selected. To determine whether  
577 our findings are sensitive to model type and specification, we applied a linear mixed model in addition to the  
578 nonparametric model reported in the main results. We found that the majority (9 of 16) of the significant  
579 effects identified by our nonparametric model, presented in Figure 6, were also found using a LMM, as described  
580 above (**Supplemental Table S4**). Using ANOVA on the LMM (using the package `lmerTest`), we uncovered  
581 an additional 3 significant effects for IL-6 (sex,  $p = 0.041$ ) and IL-10 (age,  $p = 0.0096$ ; age-by-sex,  $p = 0.020$ )  
582 [55].

583 **List of Supplemental Figures**

584 S1 Manual gating strategy for quantifying monocyte subsets . . . . . iv  
585 S2 Plasmodium-specific antibody levels higher in adults compared with infants regardless of visit . . . . . v  
586 S3 Correspondence between acute and post-treatment phenotypes . . . . . vi  
587 S4 QQ-plots of analyte phenotypes before and after Box-Cox-assisted power transformation . . . . . vii

588 **List of Supplemental Tables**

589 S1 Results from antimalarial antibody detection . . . . . viii  
590 S2 Table of *p*-values for main effects and interaction effects on blood analytes and cellular phenotypes,  
591 analyzed using a nonparametric longitudinal model . . . . . ix  
592 S3 Table of *p*-values for main effects and interaction effects on blood analyte ratios . . . . . ix  
593 S4 Table of *p*-values for main effects and interaction effects on blood analytes, analyzed using a linear  
594 mixed model . . . . . x

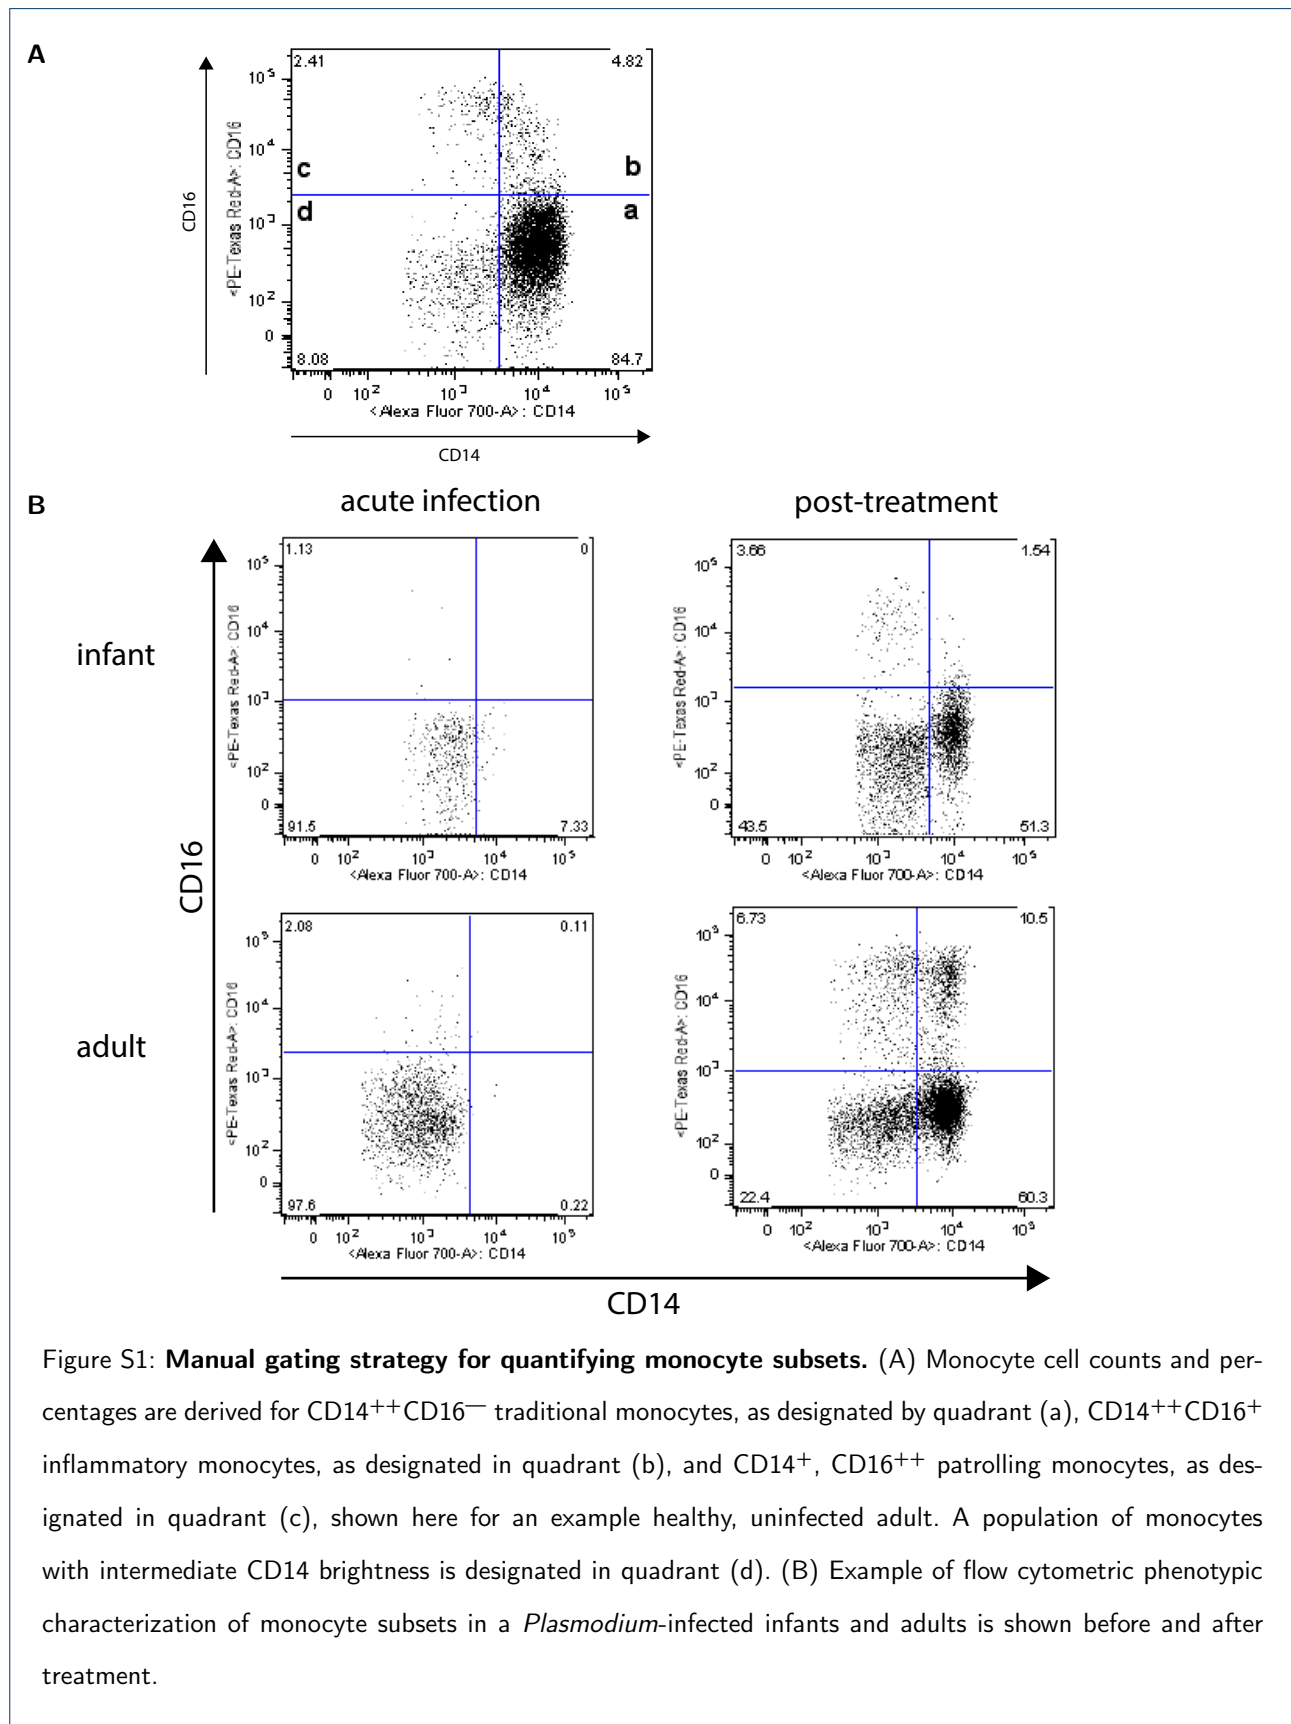



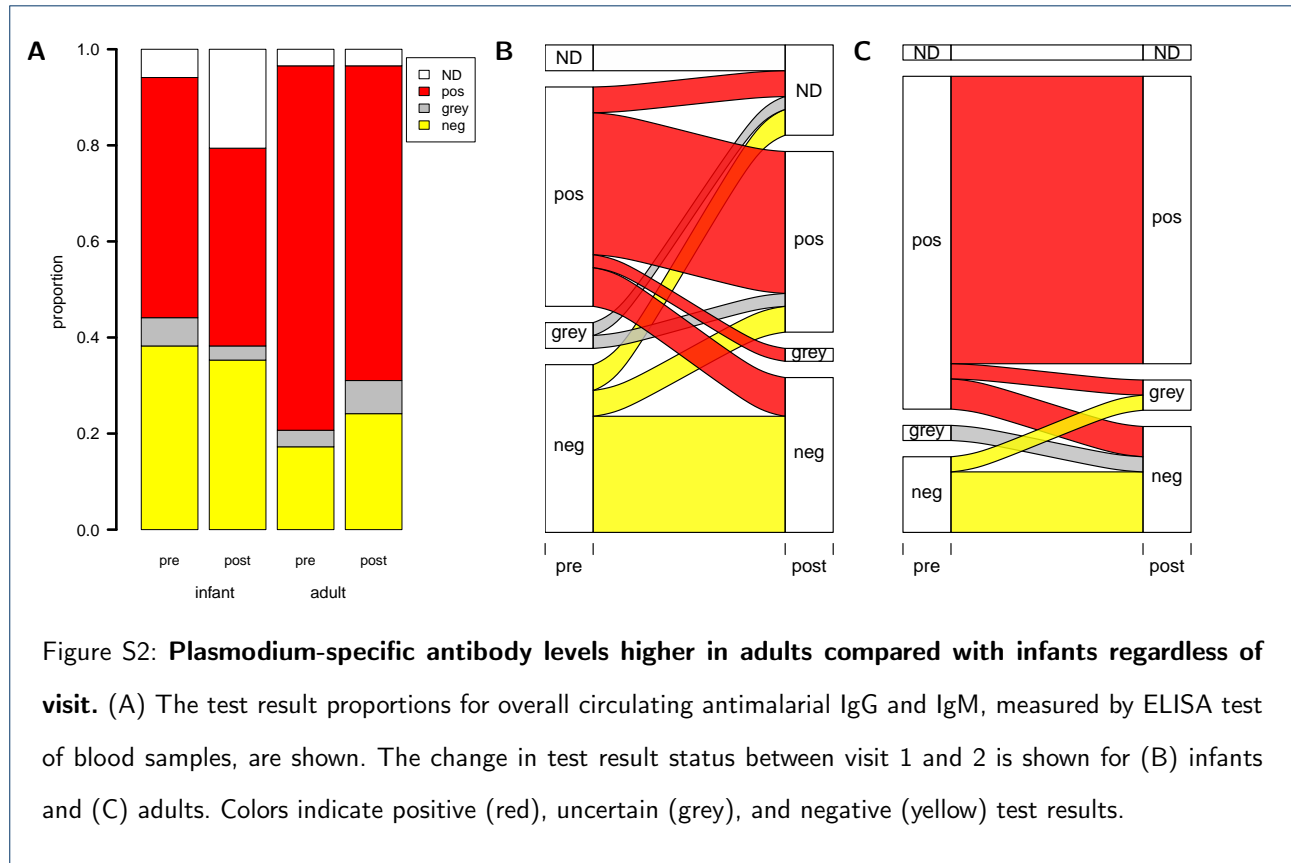

Figure S2: **Plasmodium-specific antibody levels higher in adults compared with infants regardless of visit.** (A) The test result proportions for overall circulating antimalarial IgG and IgM, measured by ELISA test of blood samples, are shown. The change in test result status between visit 1 and 2 is shown for (B) infants and (C) adults. Colors indicate positive (red), uncertain (grey), and negative (yellow) test results.

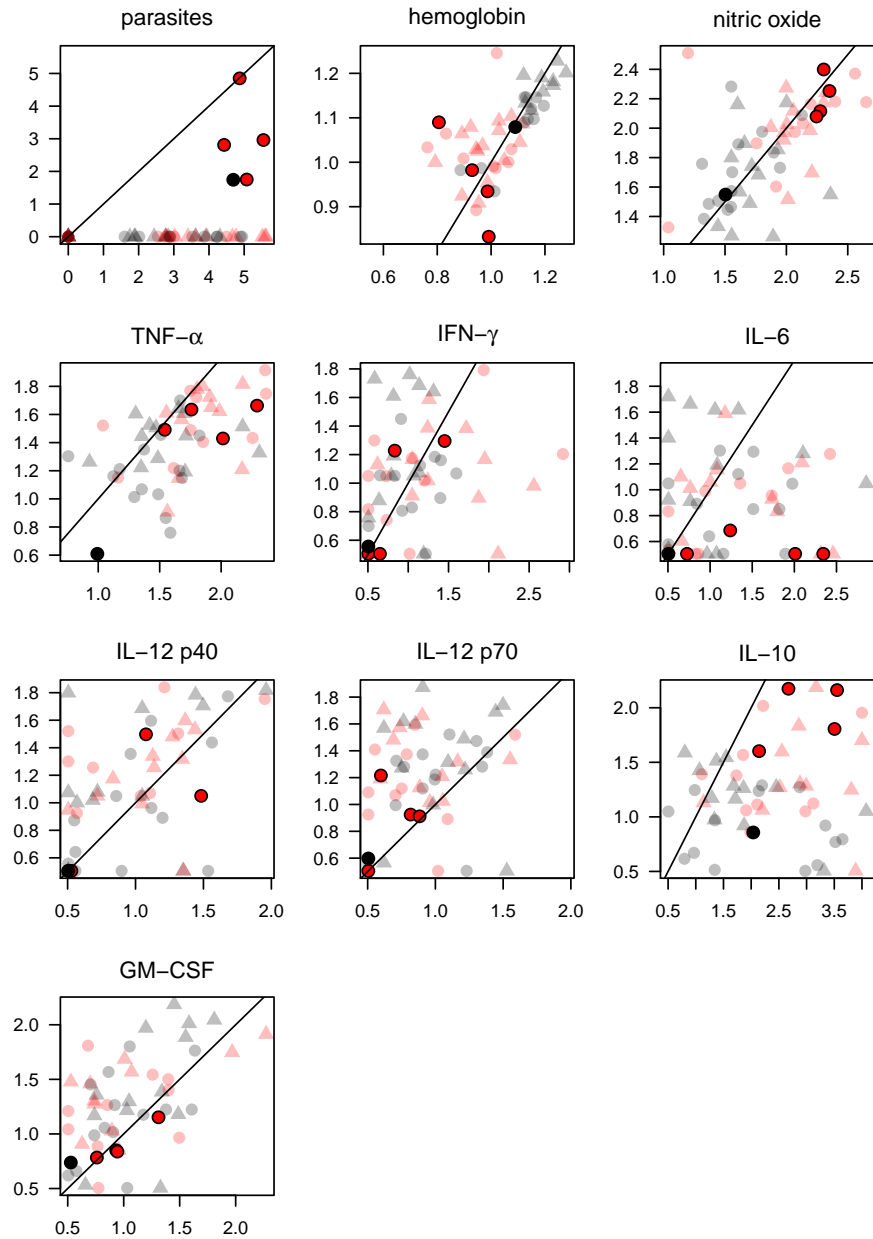

Figure S3: **Correspondence between acute and post-treatment phenotypes.** The log (base=10) values of phenotypes from Figure 2A and Figure 3 are presented, with values at Visit 1 (acute) provided along the x-axis, and values for Visit 2 (post-treatment) along the y-axis. The black line in each figure indicates  $y = x$ . Circles indicate females and triangles indicate males. Pink or red indicates infants and grey or black indicates adults. The five darker colored dots in each plot indicate phenotypes for individuals with apparent treatment failure.

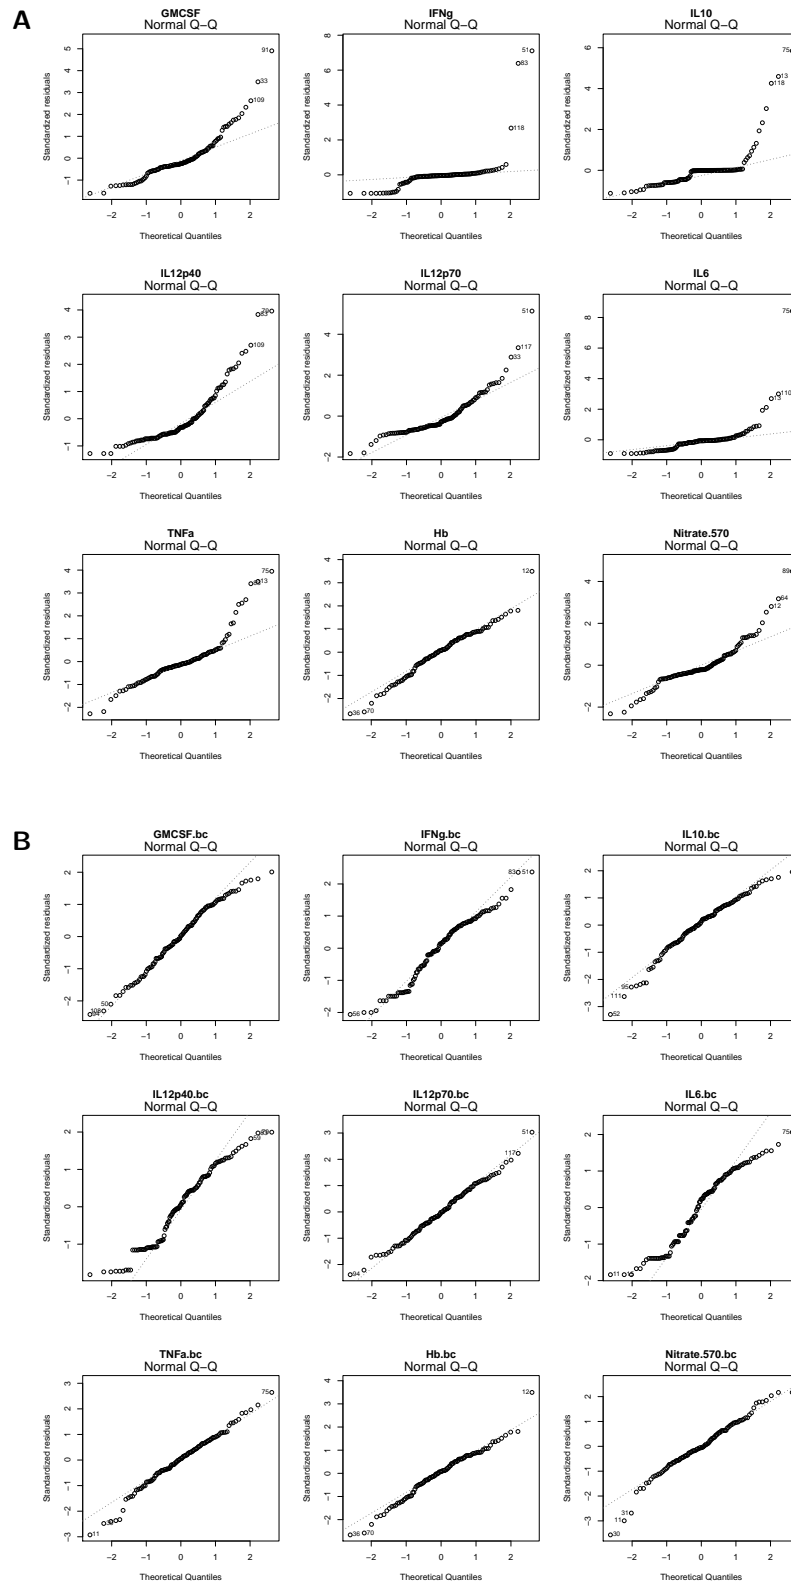

Figure S4: QQ-plots of analyte phenotypes (A) before and (B) after Box-Cox-assisted power transformation.

|   | Result   | adult-visit-1 | adult-visit-2 | infant-visit-1 | infant-visit-2 |
|---|----------|---------------|---------------|----------------|----------------|
| 1 | positive | 0.793         | 0.655         | 0.500          | 0.441          |
| 2 | grey     | 0.035         | 0.069         | 0.059          | 0.029          |
| 3 | negative | 0.172         | 0.241         | 0.382          | 0.382          |
| 4 | N/A      | 0.000         | 0.035         | 0.059          | 0.147          |
| 5 | Total    | 1.000         | 1.000         | 1.000          | 1.000          |

Table S1: **Results from antimalarial antibody detection.** Values indicate the proportion of samples within each age-visit group that received a given result for total Ig (IgG and IgM), where: "grey" indicates that the sample result was indeterminate and "N/A" indicates that the sample or result is missing.

| Analyte                                  | Age       | Sex       | Visit     | Age:Sex   | Age:Visit | Sex:Visit | Age:Sex:Visit |
|------------------------------------------|-----------|-----------|-----------|-----------|-----------|-----------|---------------|
| TNF- $\alpha$                            | 1.200e-07 | 4.569e-02 | 1.282e-07 | 3.633e-01 | 4.842e-01 | 5.443e-01 | 7.726e-01     |
| IFN- $\gamma$                            | 1.391e-01 | 2.048e-02 | 8.164e-01 | 1.844e-01 | 2.069e-01 | 8.839e-01 | 3.851e-03     |
| IL-6                                     | 4.632e-01 | 6.416e-02 | 1.907e-02 | 6.059e-01 | 5.987e-02 | 6.954e-02 | 4.721e-01     |
| IL12(p40)                                | 3.549e-01 | 2.410e-01 | 8.155e-02 | 9.803e-01 | 6.300e-01 | 8.602e-01 | 3.475e-02     |
| IL12(p70)                                | 2.641e-01 | 1.291e-02 | 3.483e-06 | 9.633e-01 | 4.315e-01 | 3.689e-01 | 9.690e-01     |
| IL-10                                    | 3.305e-07 | 3.055e-01 | 2.566e-15 | 5.364e-01 | 9.228e-01 | 6.009e-01 | 7.045e-02     |
| GM-CSF                                   | 4.867e-01 | 6.934e-02 | 1.151e-03 | 3.555e-01 | 4.518e-01 | 4.510e-01 | 2.546e-01     |
| hemoglobin                               | 3.860e-15 | 5.592e-03 | 2.845e-01 | 7.950e-02 | 3.134e-04 | 8.303e-01 | 8.445e-01     |
| nitric oxide                             | 1.191e-10 | 6.485e-01 | 8.767e-01 | 5.313e-01 | 6.629e-01 | 1.525e-01 | 5.243e-01     |
| CD33 <sup>+</sup> , % of live            | 1.234e-01 | 3.144e-01 | 6.351e-02 | 8.146e-01 | 5.770e-01 | 3.976e-01 | 5.409e-01     |
| mDC, % of live                           | 4.666e-02 | 9.955e-01 | 6.032e-08 | 2.024e-01 | 4.282e-02 | 7.180e-01 | 7.882e-01     |
| monocytes, % of live                     | 1.903e-01 | 3.264e-01 | 1.303e-01 | 9.151e-01 | 4.617e-01 | 3.037e-01 | 5.550e-01     |
| infl. monocytes, % of CD163 <sup>+</sup> | 1.269e-01 | 3.639e-01 | 7.735e-01 | 9.002e-01 | 1.780e-01 | 5.000e-01 | 5.468e-01     |
| patr. monocytes, % of CD163 <sup>+</sup> | 7.971e-01 | 4.551e-01 | 1.168e-05 | 3.814e-01 | 1.104e-01 | 2.660e-01 | 9.464e-01     |
| trad. monocytes, % of CD163 <sup>+</sup> | 1.072e-01 | 1.738e-01 | 7.886e-01 | 9.705e-01 | 8.510e-01 | 6.950e-01 | 9.854e-01     |
| CD14 <sup>low</sup> , % of traditional   | 4.337e-01 | 9.392e-01 | 1.648e-02 | 2.313e-01 | 4.256e-01 | 3.040e-01 | 2.756e-01     |

Table S2: Table of  $p$ -values for main effects and interaction effects on blood analytes and cellular phenotypes, analyzed using a nonparametric longitudinal model.

| Analyte Proportion           | Age       | Sex       | Visit     | Age:Sex   | Age:Visit | Sex:Visit | Age:Sex:Visit |
|------------------------------|-----------|-----------|-----------|-----------|-----------|-----------|---------------|
| TNF- $\alpha$ /IFN- $\gamma$ | 9.121e-02 | 5.852e-01 | 2.680e-03 | 2.673e-02 | 8.262e-03 | 5.840e-01 | 1.691e-02     |
| TNF- $\alpha$ / IL-6         | 2.857e-03 | 6.443e-01 | 6.791e-01 | 9.455e-02 | 2.693e-02 | 1.370e-01 | 6.000e-01     |
| TNF- $\alpha$ / IL12(p70)    | 5.861e-08 | 4.937e-01 | 3.807e-18 | 3.270e-01 | 4.423e-01 | 3.774e-01 | 4.588e-01     |
| TNF- $\alpha$ / IL10         | 2.706e-02 | 6.958e-01 | 4.555e-16 | 8.375e-01 | 2.540e-01 | 9.063e-01 | 4.831e-02     |
| TNF- $\alpha$ / GMCSF        | 1.907e-05 | 4.098e-01 | 8.120e-13 | 8.466e-01 | 5.674e-01 | 9.900e-01 | 2.218e-01     |
| IFN- $\gamma$ / IL-6         | 3.077e-01 | 9.418e-01 | 1.782e-03 | 9.354e-01 | 3.535e-01 | 1.892e-02 | 3.071e-01     |
| IFN- $\gamma$ / IL-12(p70)   | 1.128e-03 | 7.762e-01 | 5.501e-06 | 1.244e-01 | 2.191e-02 | 4.324e-01 | 8.849e-04     |
| IFN- $\gamma$ / IL-10        | 1.034e-03 | 6.961e-01 | 2.844e-19 | 6.569e-01 | 6.257e-01 | 8.150e-01 | 5.466e-01     |
| IFN- $\gamma$ / GM-CSF       | 2.533e-02 | 3.089e-01 | 1.093e-03 | 3.406e-02 | 3.338e-01 | 9.142e-01 | 9.116e-04     |
| IL-6 / IL-12(p70)            | 2.524e-01 | 8.248e-01 | 1.500e-11 | 6.402e-01 | 1.385e-04 | 3.185e-01 | 1.507e-01     |
| IL-6 / IL-10                 | 5.282e-05 | 3.498e-01 | 3.055e-19 | 8.788e-01 | 5.374e-01 | 1.644e-01 | 1.252e-02     |
| IL-6 / GM-CSF                | 3.188e-01 | 5.405e-01 | 1.493e-10 | 2.702e-01 | 8.994e-04 | 7.862e-02 | 3.733e-01     |
| IL-12(p70) / IL-10           | 7.763e-06 | 5.190e-01 | 4.754e-22 | 8.536e-01 | 5.150e-01 | 7.358e-01 | 1.019e-01     |
| IL-12(p70) / GM-CSF          | 6.258e-01 | 9.159e-01 | 9.159e-02 | 2.446e-01 | 4.148e-01 | 8.555e-01 | 3.113e-01     |
| IL-10 / GM-CSF               | 2.796e-05 | 4.987e-01 | 1.242e-22 | 7.694e-01 | 6.191e-01 | 8.830e-01 | 7.485e-02     |

Table S3: Table of  $p$ -values for main effects and interaction effects on blood analyte ratios.

| Analyte       | Age       | Sex       | Visit     | Age:Sex   | Age:Visit | Sex:Visit | Age:Sex:Visit |
|---------------|-----------|-----------|-----------|-----------|-----------|-----------|---------------|
| TNF- $\alpha$ | 7.852e-05 | 4.299e-03 | 1.682e-02 | 6.426e-02 | 6.774e-01 | 5.274e-01 | 6.689e-01     |
| IFN- $\gamma$ | 4.406e-01 | 8.479e-02 | 9.331e-01 | 5.255e-01 | 7.562e-01 | 2.155e-01 | 6.223e-02     |
| IL-6          | 6.177e-01 | 4.127e-02 | 2.161e-01 | 8.035e-01 | 2.432e-01 | 1.480e-01 | 6.531e-01     |
| IL-12(p40)    | 1.144e-01 | 1.068e-01 | 9.536e-01 | 2.881e-01 | 2.896e-01 | 2.898e-01 | 1.201e-01     |
| IL-12(p70)    | 9.197e-01 | 6.301e-02 | 3.518e-01 | 7.654e-01 | 7.349e-01 | 3.455e-01 | 5.923e-01     |
| IL-10         | 2.306e-05 | 9.613e-03 | 4.598e-07 | 1.986e-02 | 2.178e-01 | 8.230e-02 | 6.527e-02     |
| GM-CSF        | 9.948e-01 | 1.352e-01 | 3.964e-01 | 7.037e-01 | 8.984e-01 | 9.816e-01 | 8.491e-01     |
| hemoglobin    | 3.866e-02 | 1.711e-02 | 3.956e-01 | 1.505e-01 | 3.248e-02 | 6.111e-01 | 8.220e-01     |
| nitric oxide  | 5.558e-04 | 8.707e-01 | 5.654e-01 | 6.656e-01 | 8.911e-01 | 3.711e-01 | 7.026e-01     |

Table S4: **Table of  $p$ -values for main effects and interaction effects on blood analytes, analyzed using a linear mixed model.** P-values for model intercepts were all highly significant (ranging in scale from  $10^{-17}$  to  $10^{-31}$ ), and were omitted from this table.
